# Supplementary material
Source: publisher figshare collection journal article supplement (https://acs.figshare.com/ndownloader/files/3899818)
Supplement: Supplementary file 1 [file 3899818]

# Supporting Information

## Substituent-Enabled Oxidative Dehydrogenative Cross-Coupling of 1,4-Naphthoquinones with Alkenes

Chi Zhang,<sup>†,§</sup> Meining Wang,<sup>‡,§</sup> Zhoulong Fan,<sup>‡</sup> Li-Ping Sun,<sup>\*,†</sup> and Ao Zhang<sup>\*,‡</sup>

<sup>†</sup>Department of Medicinal Chemistry, China Pharmaceutical University, Nanjing 210009, China.

<sup>‡</sup>CAS Key Laboratory of Receptor Research, and Synthetic Organic & Medicinal Chemistry Laboratory (SOMCL), Shanghai Institute of Materia Medica (SIMM), Chinese Academy of Sciences, Shanghai 201203, China.

<sup>§</sup>These two authors contributed equally to this work.

### Table of Contents

|                                            |     |
|--------------------------------------------|-----|
| 1. HMBC Spectrum of compound 3ba.....      | S2  |
| 2. NMR Spectra of Products.....            | S3  |
| 3. Kinetic Isotope Effect Experiments..... | S29 |

# 1. HMBC Spectrum of compound 3ba

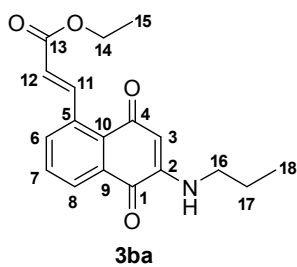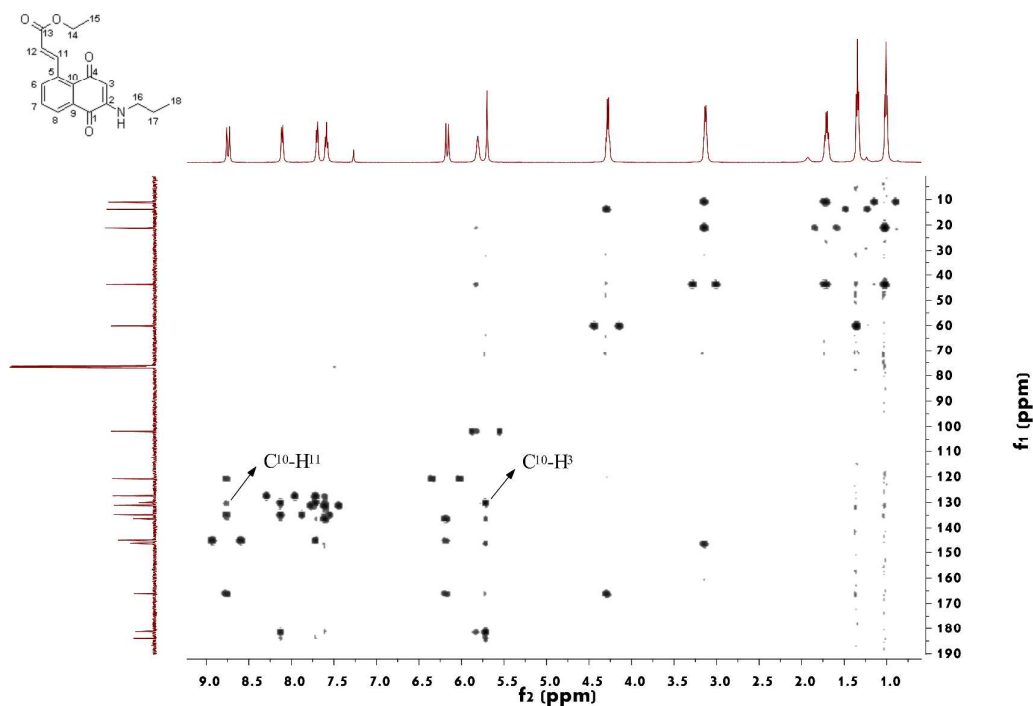

HMBC correlations [ $\delta_C$  130.1 (C-10) with  $\delta_H$  8.73 (H-11) and  $\delta_C$  130.1 (C-10) with  $\delta_H$  5.68 (H-3)] placed the alkene group at C-5.

## 2. NMR Spectra of Products

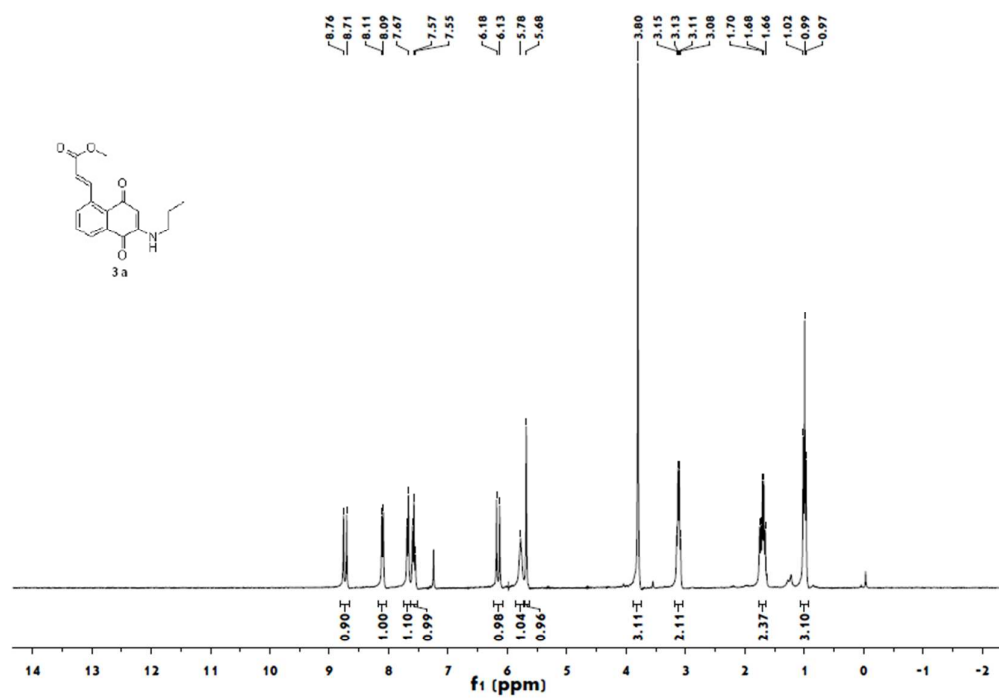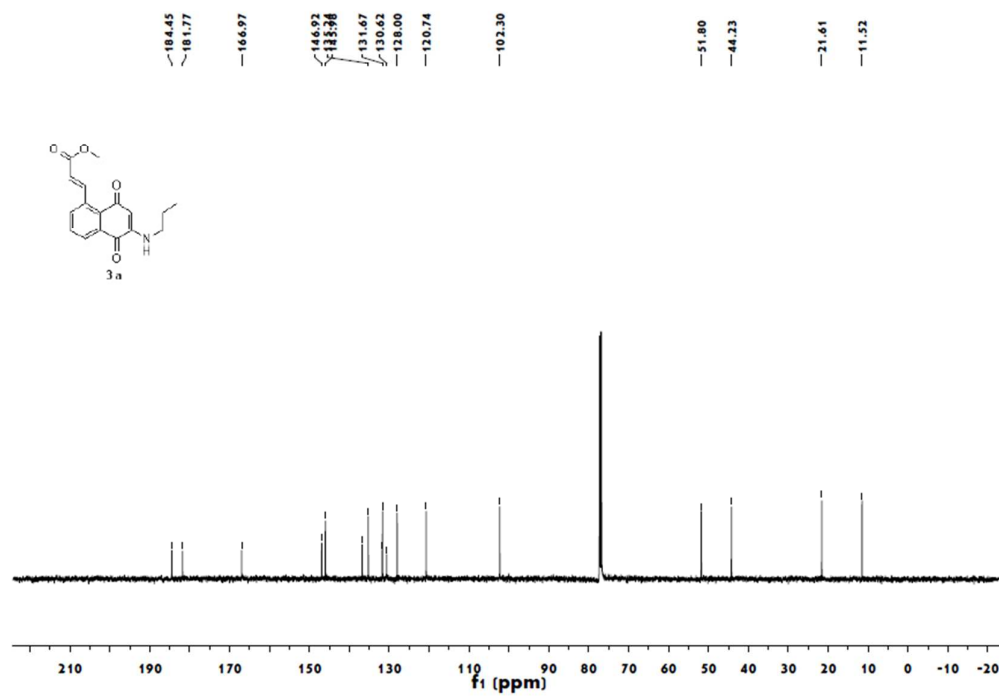

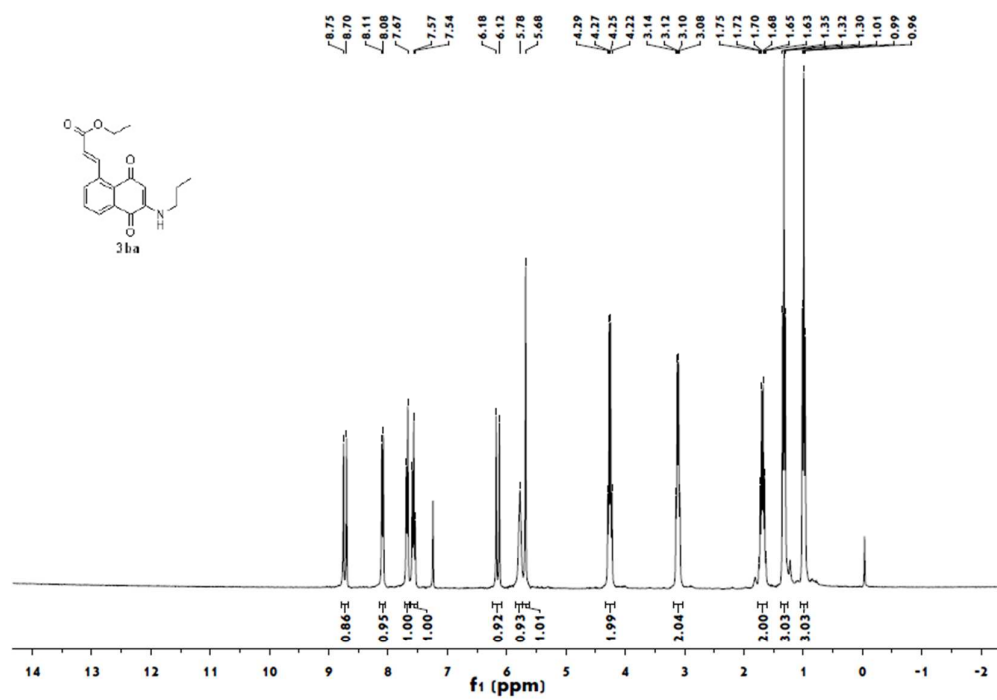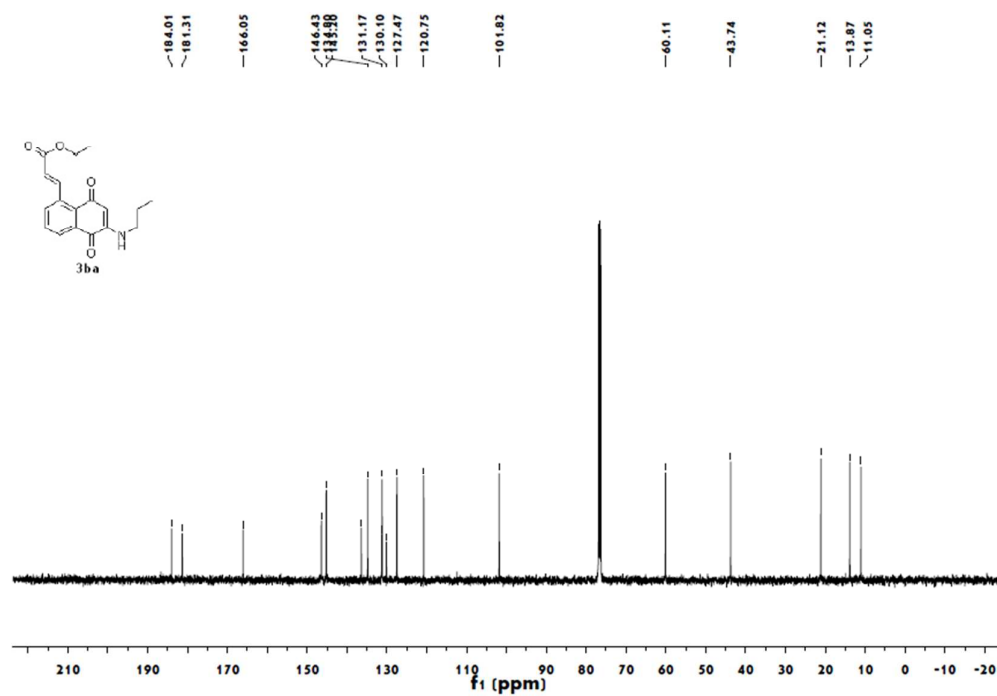

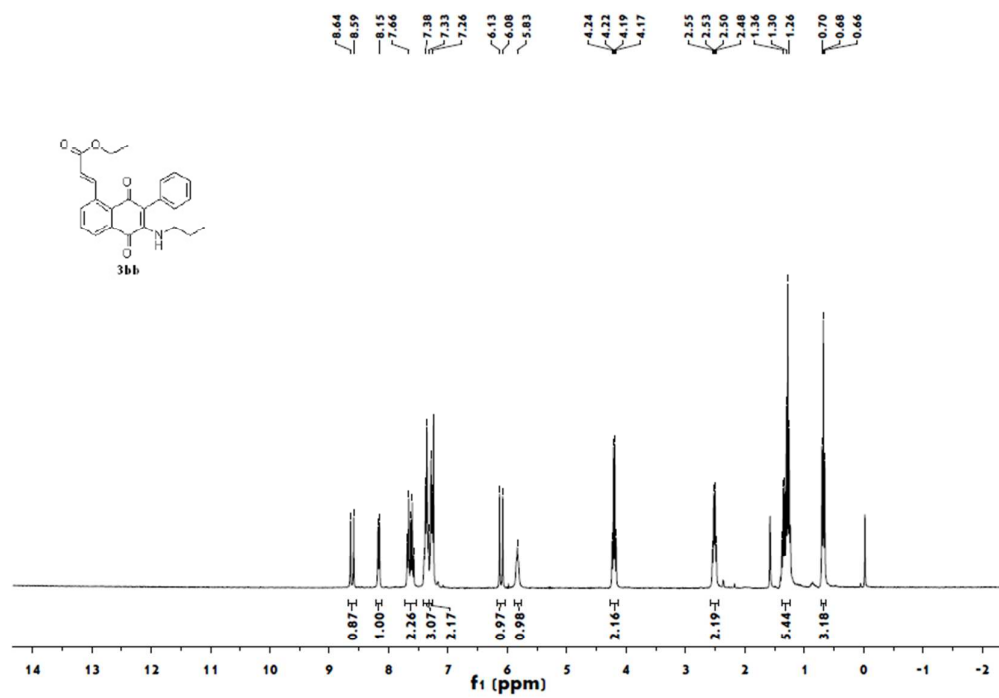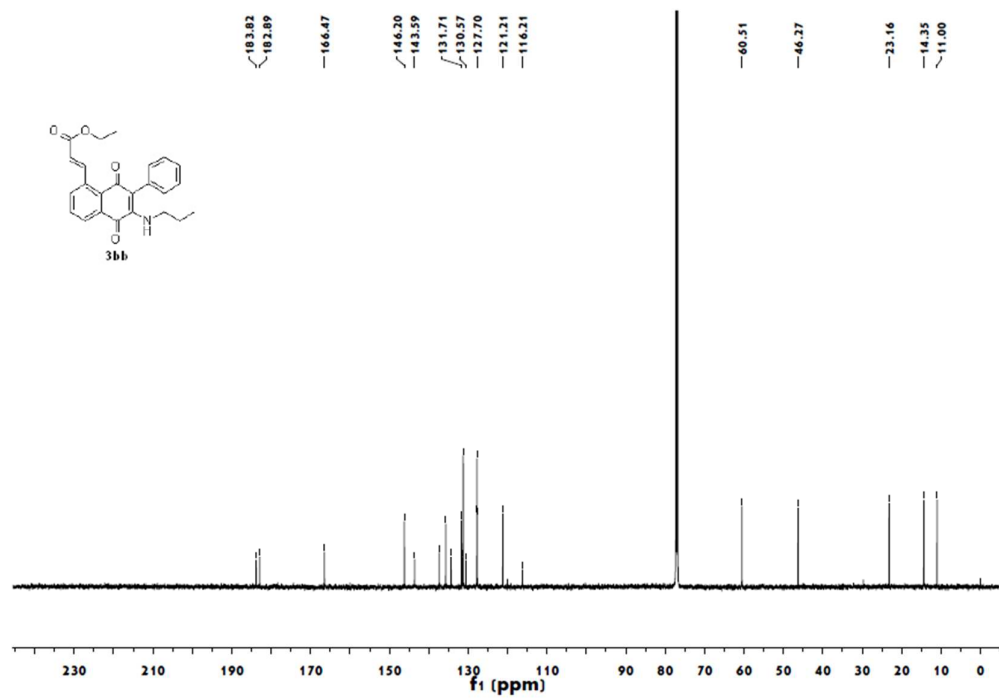

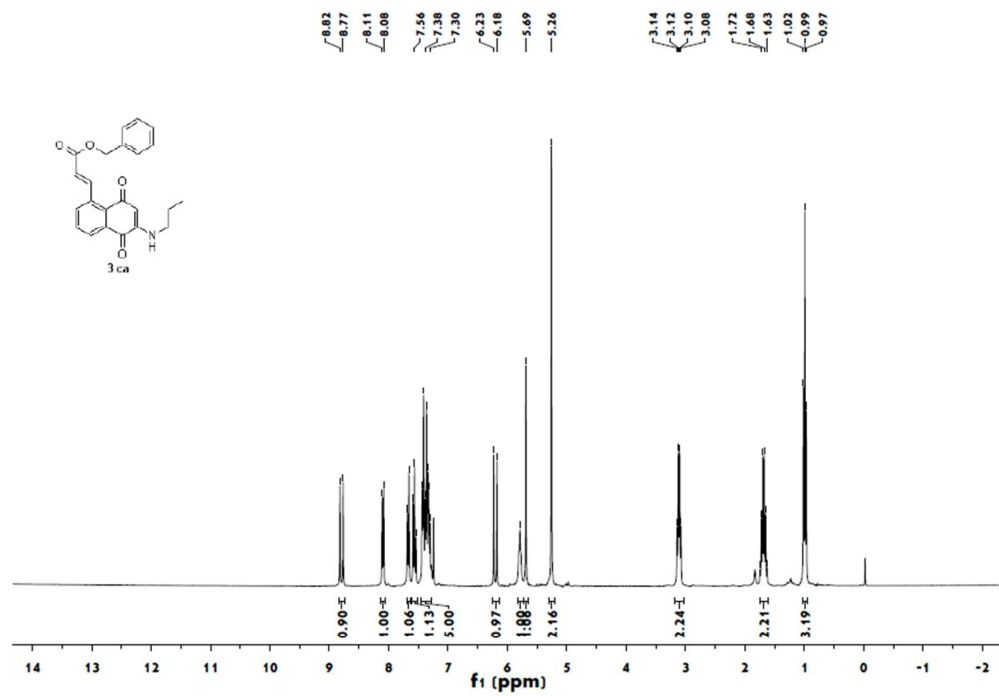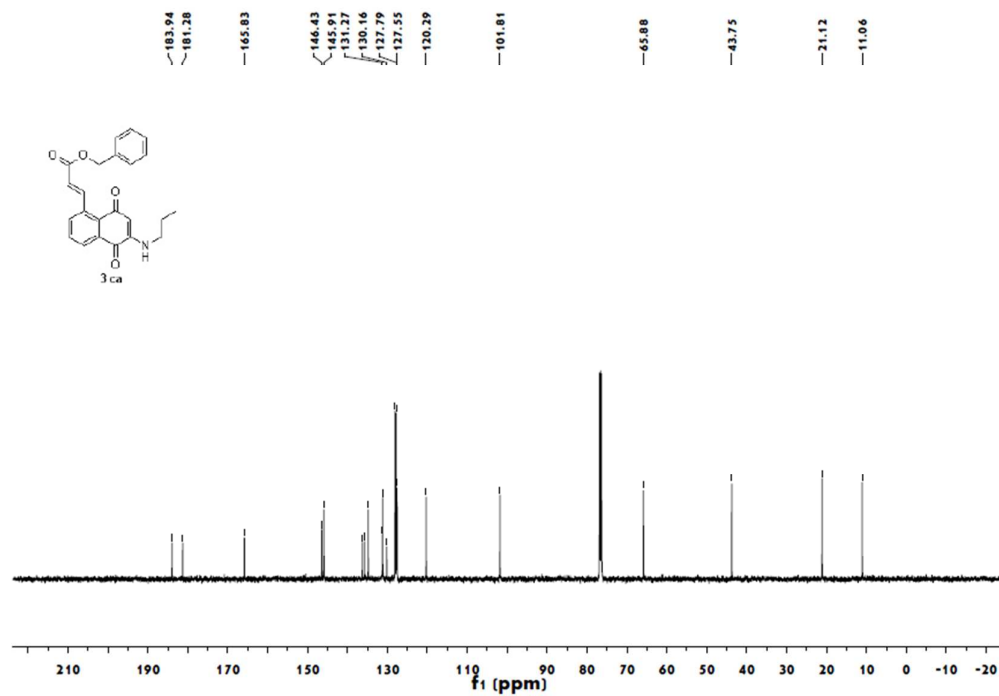

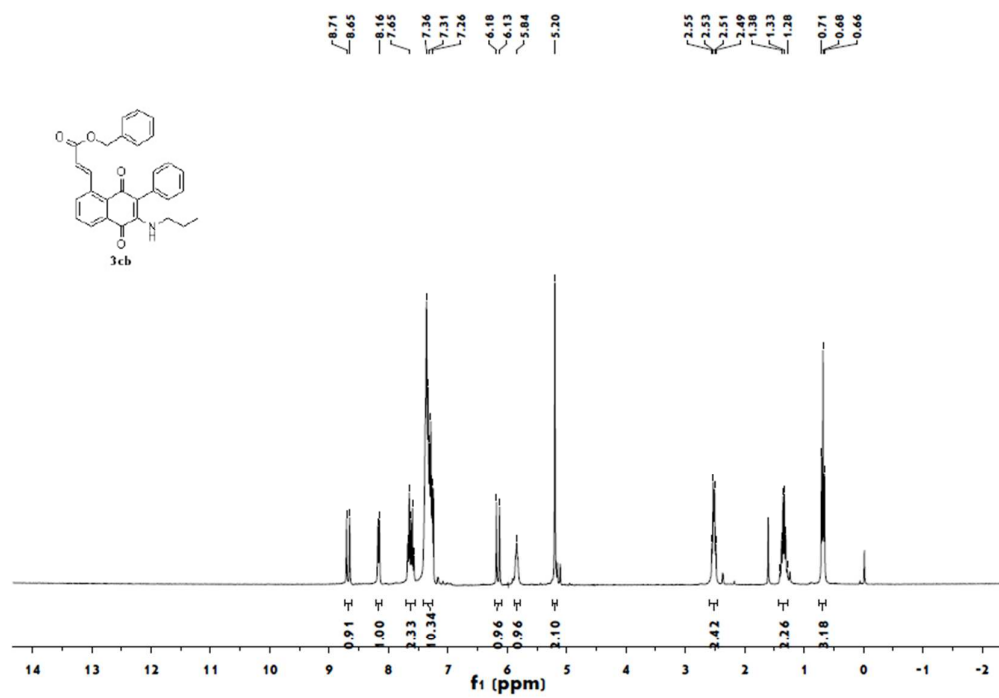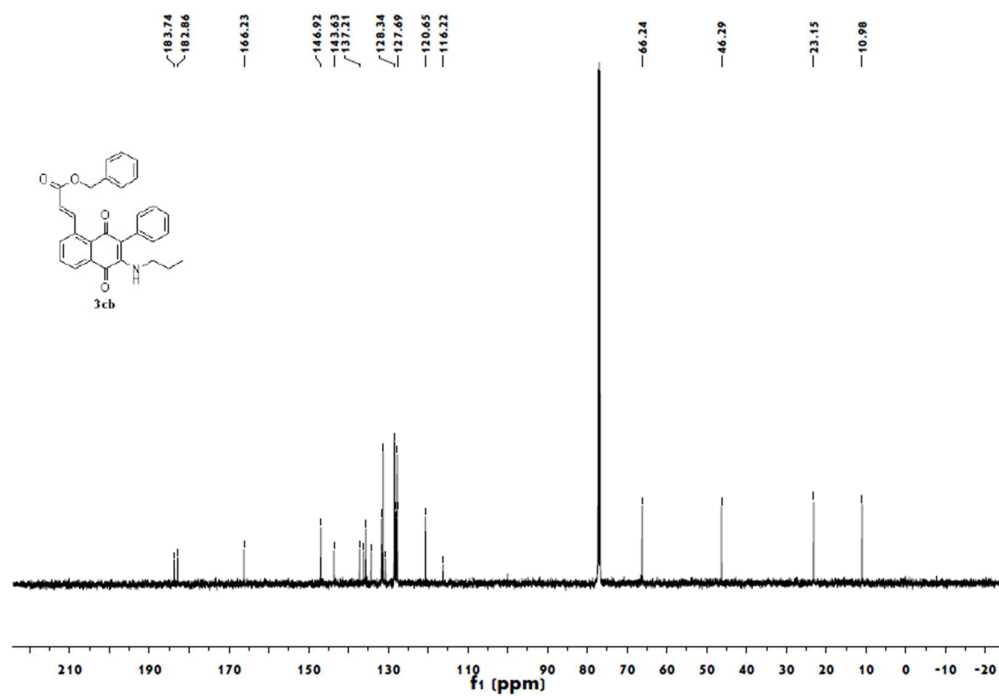

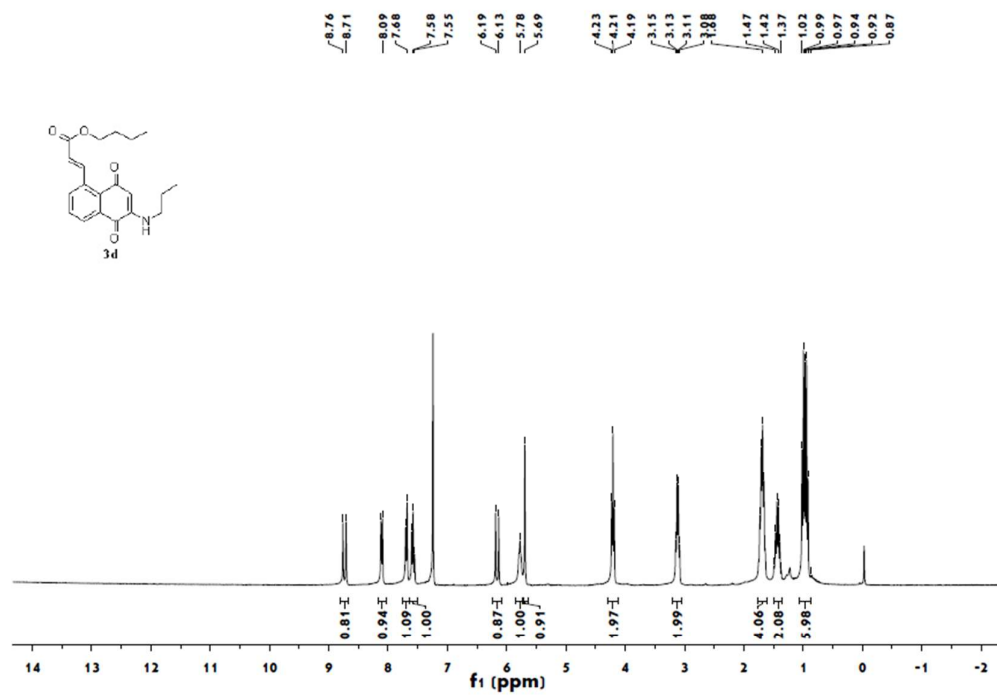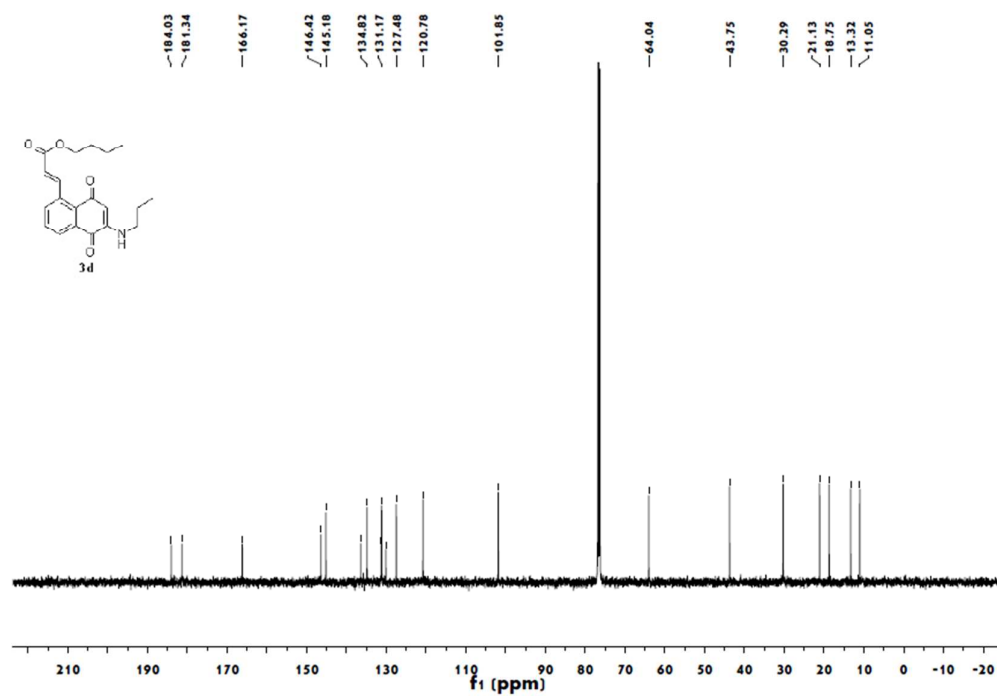



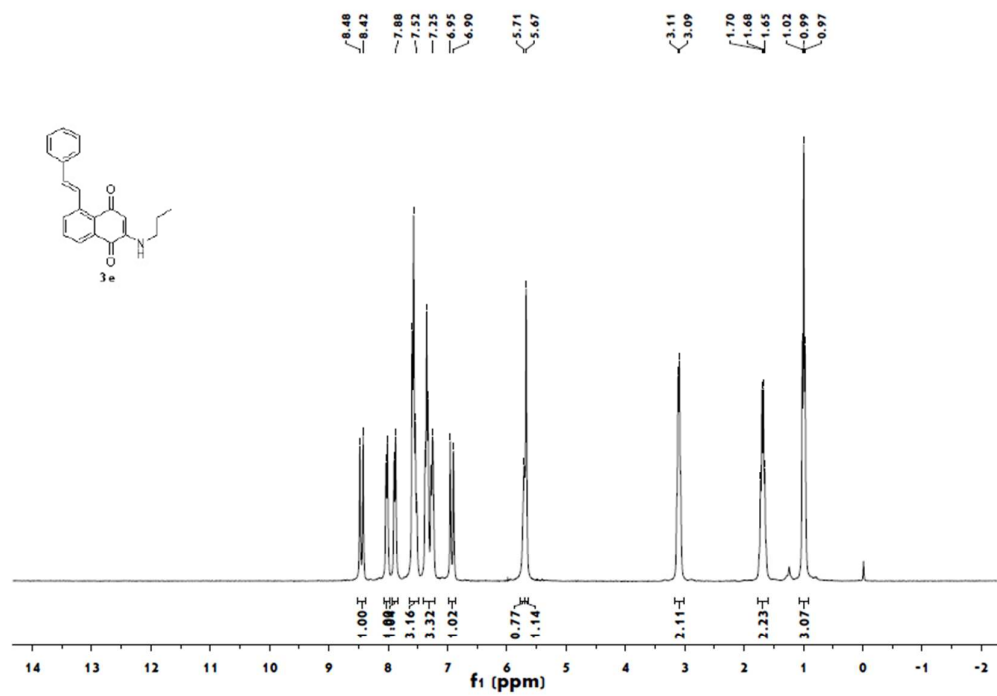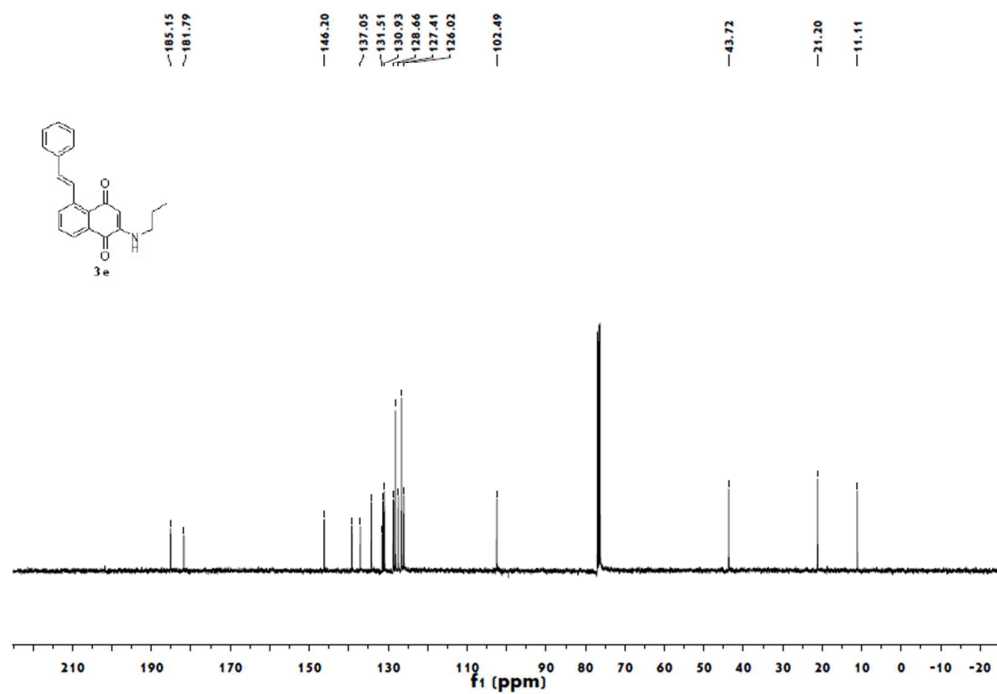

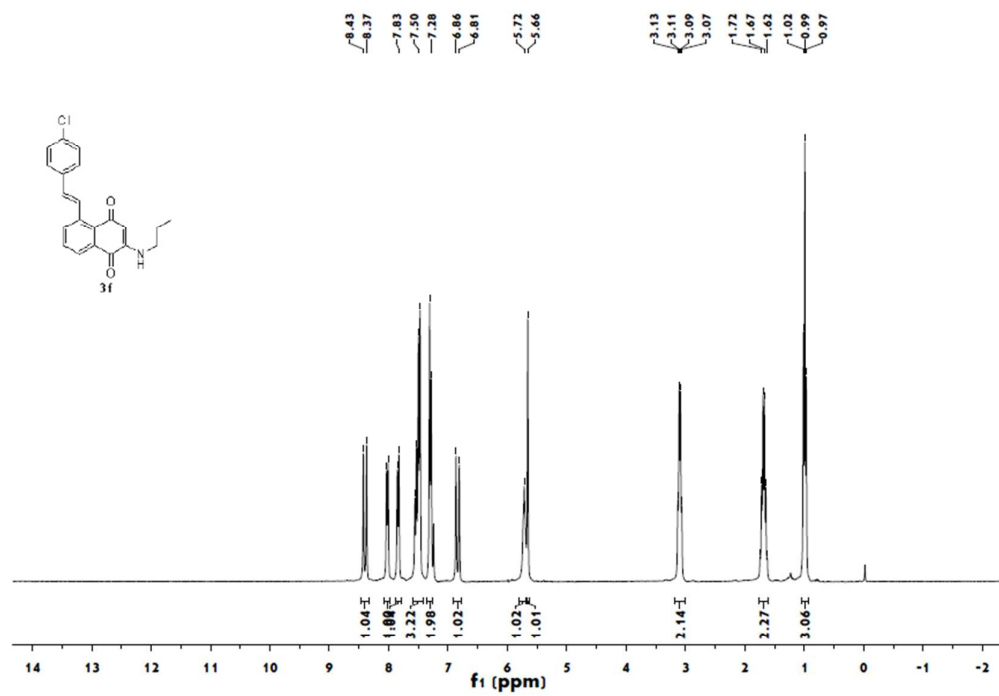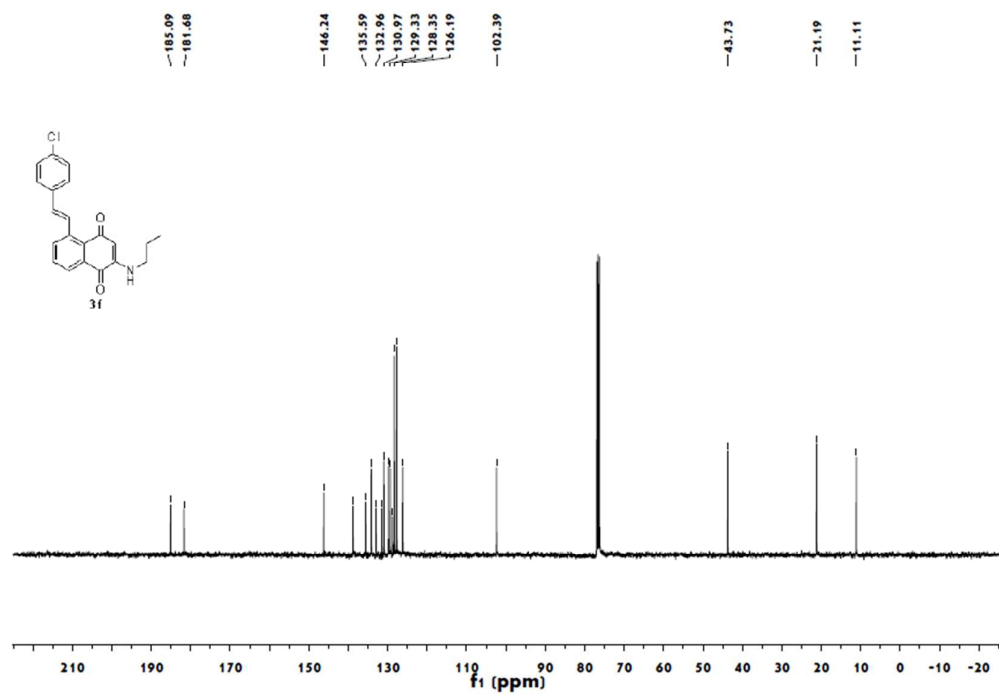

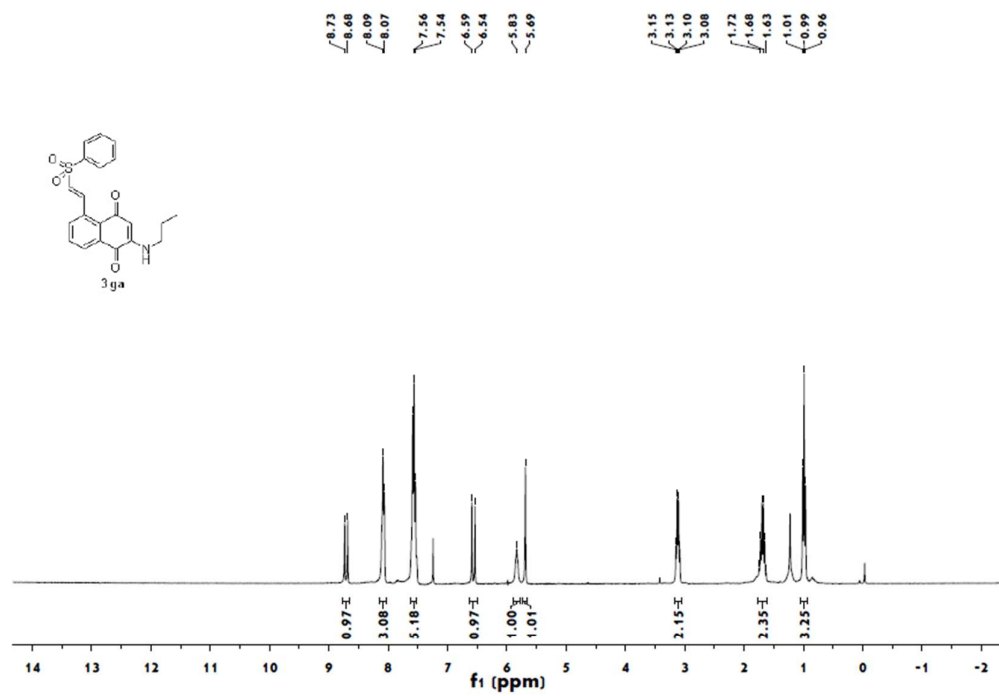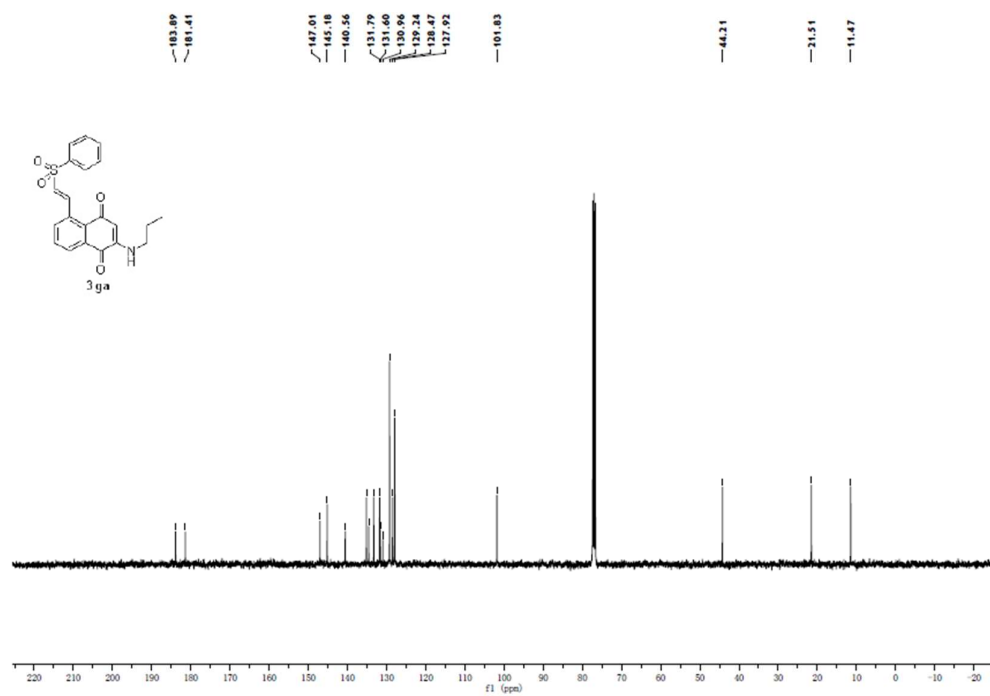

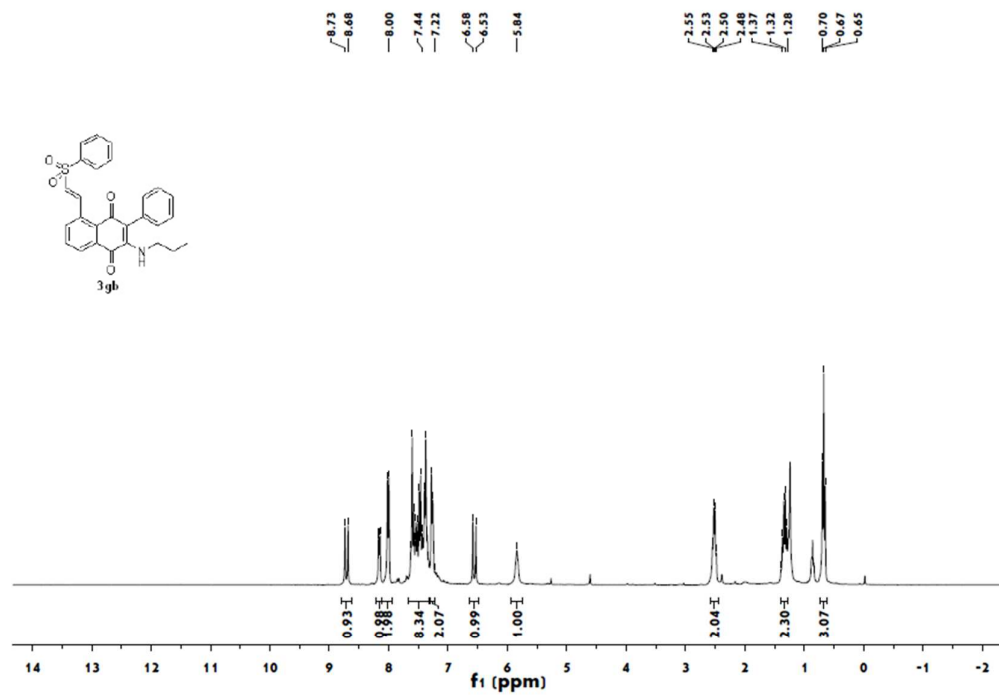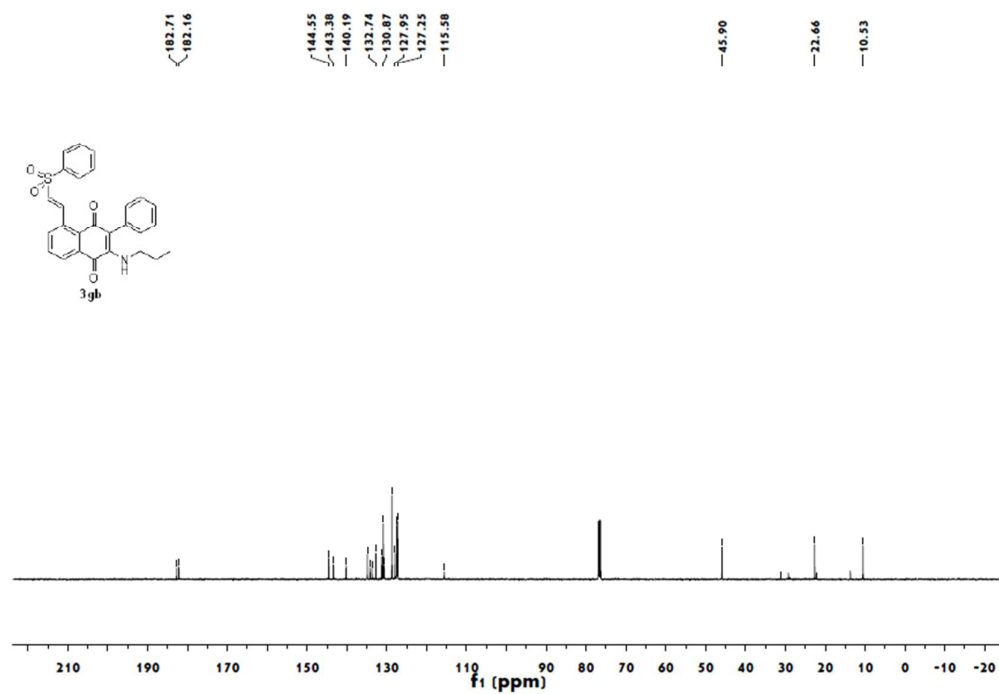

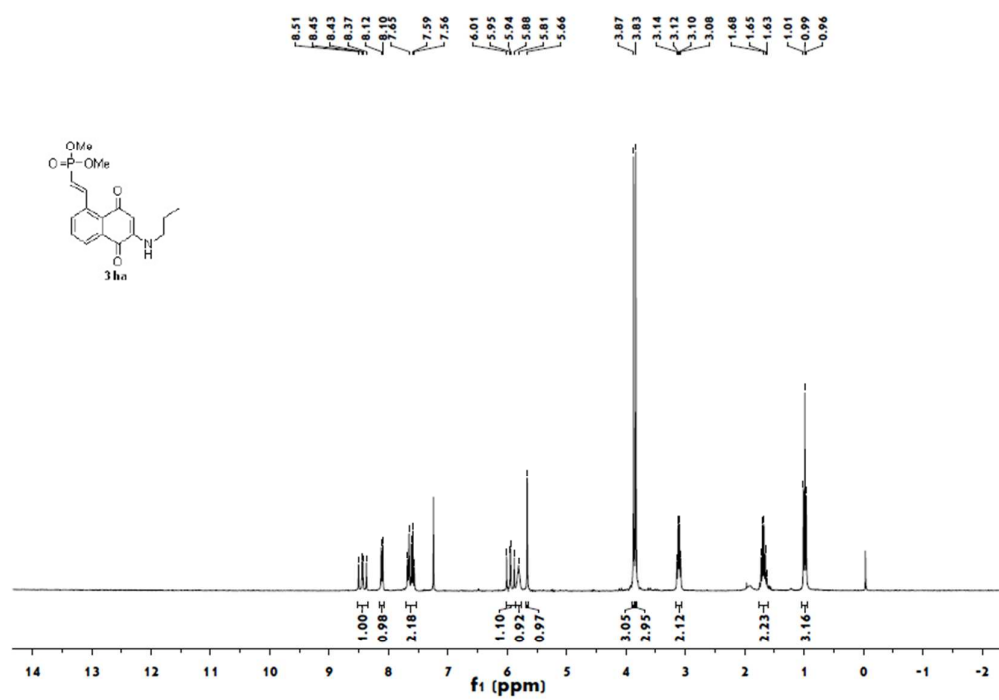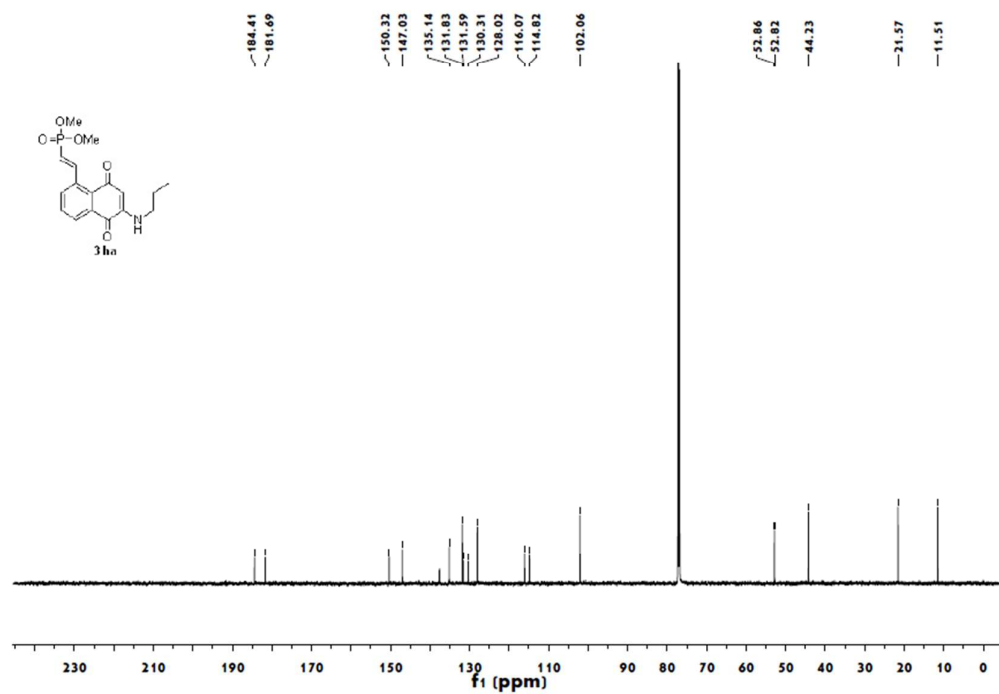

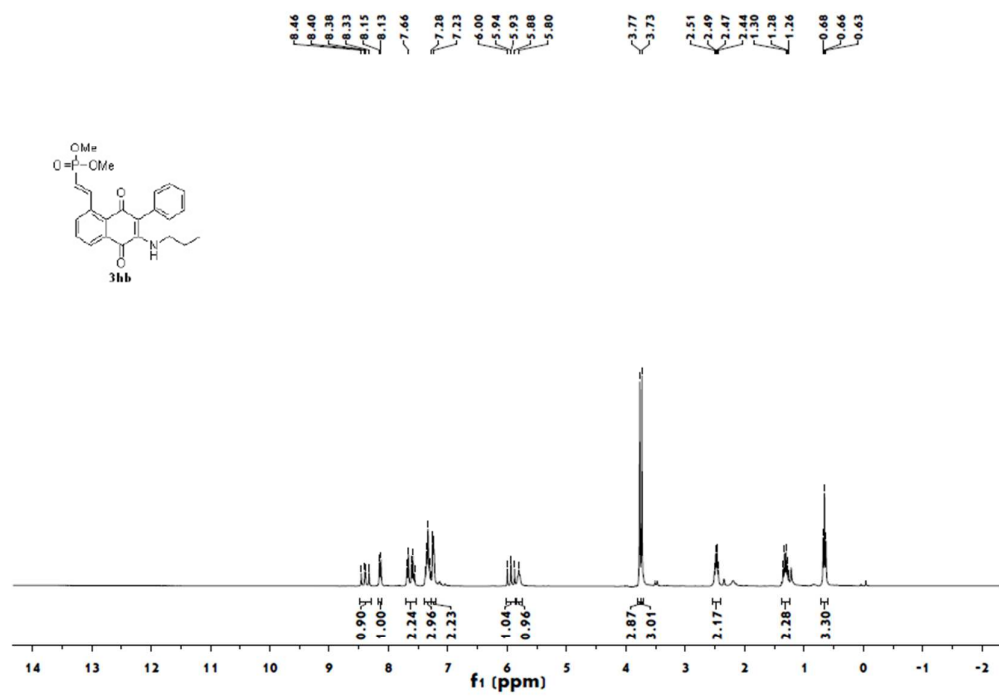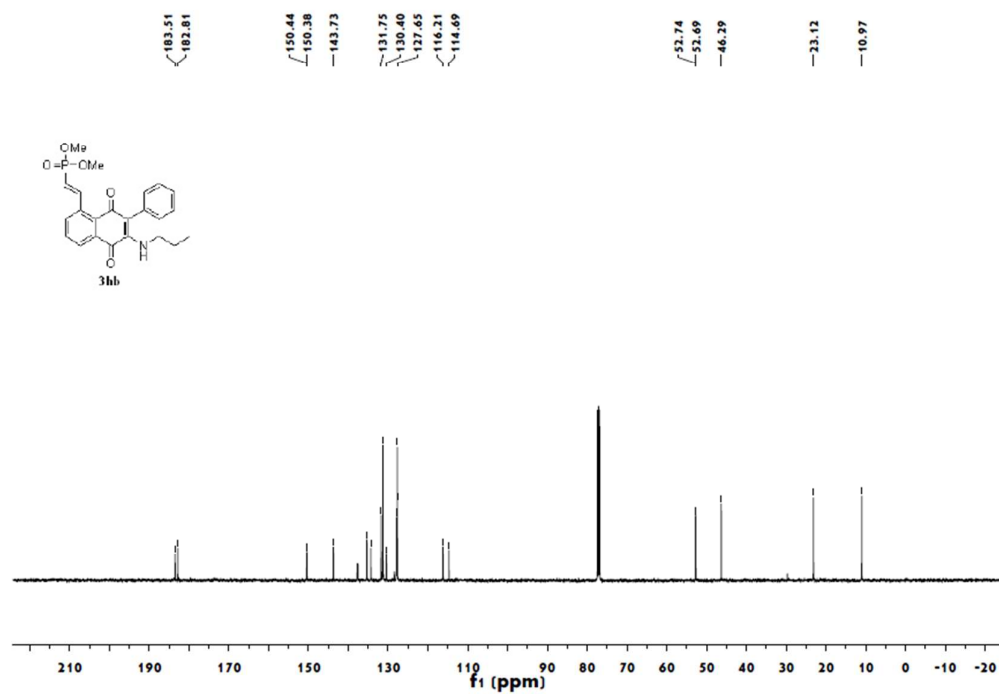

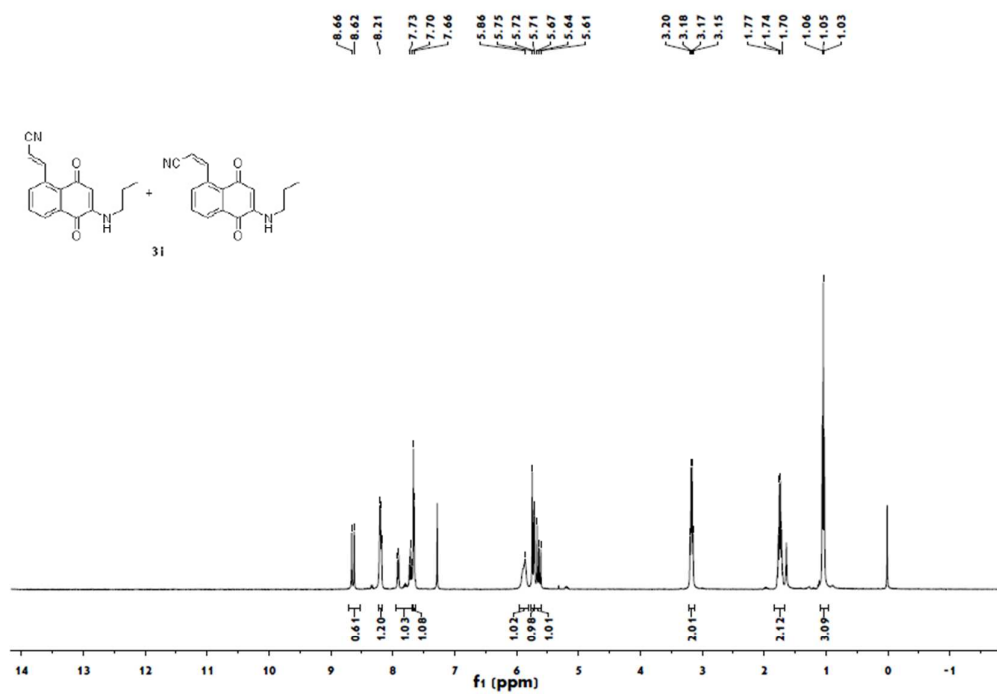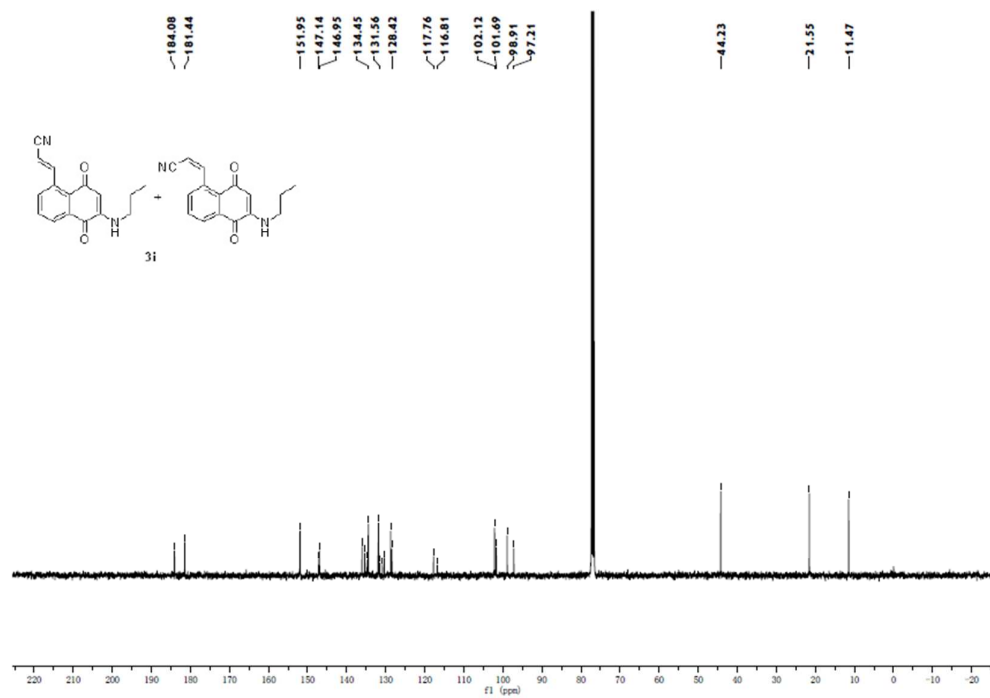

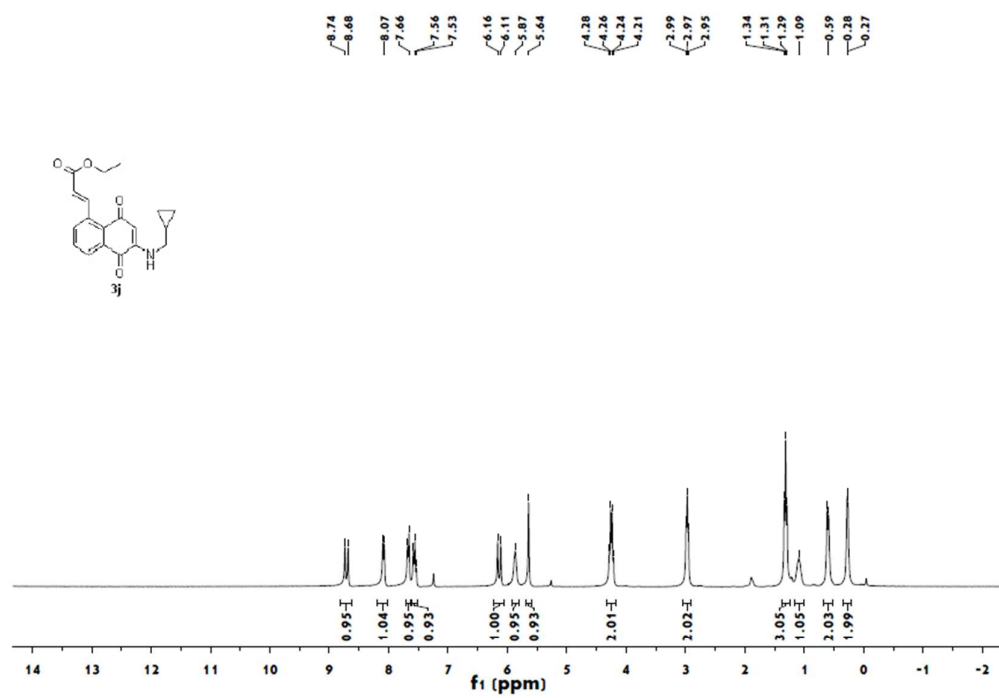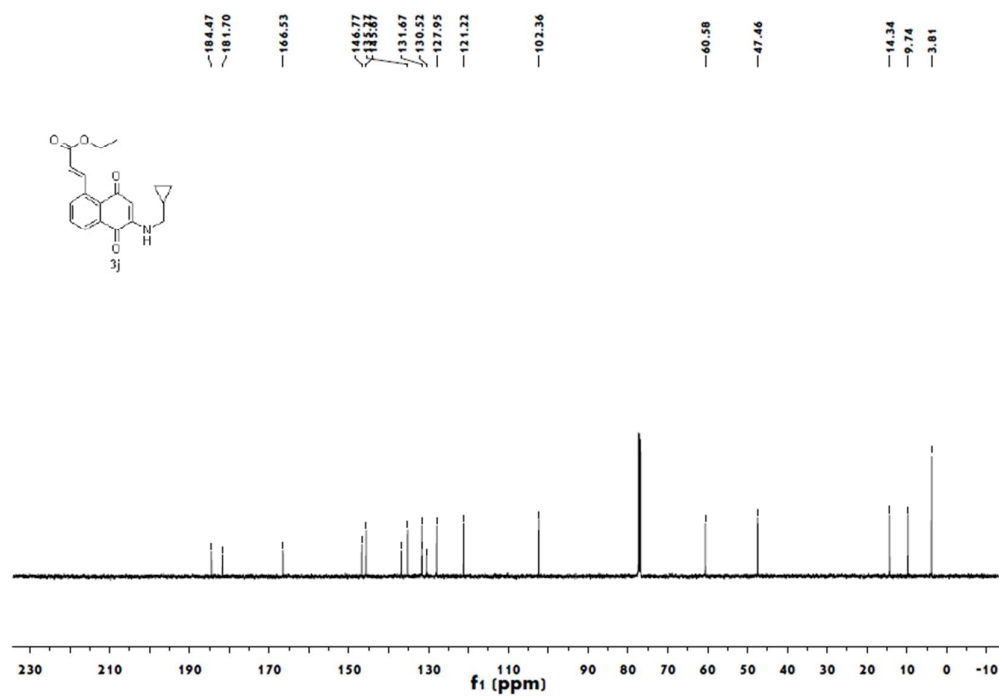



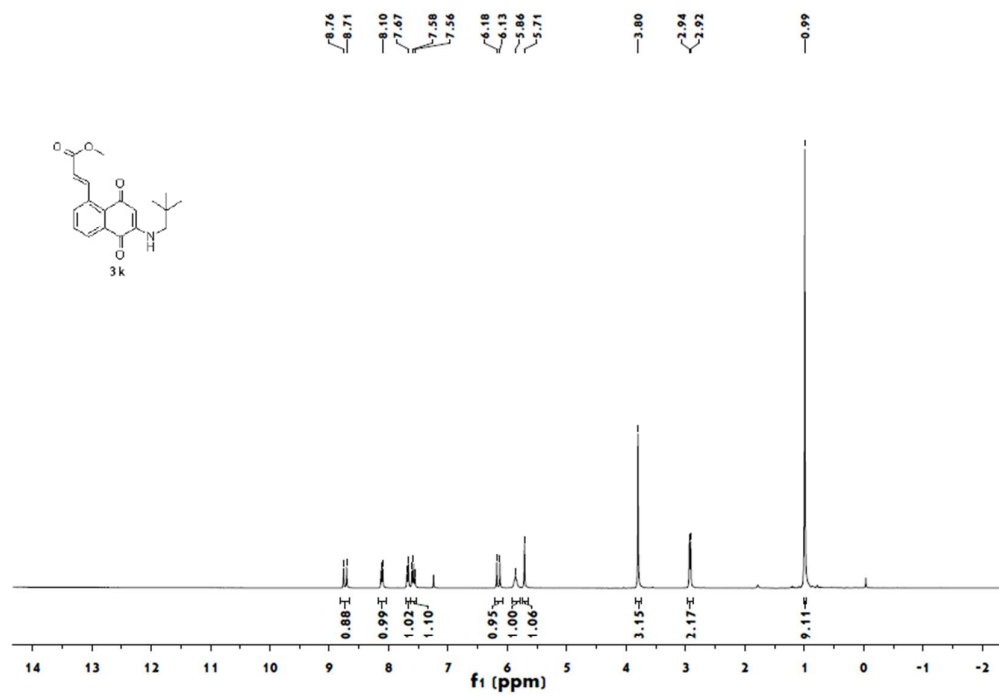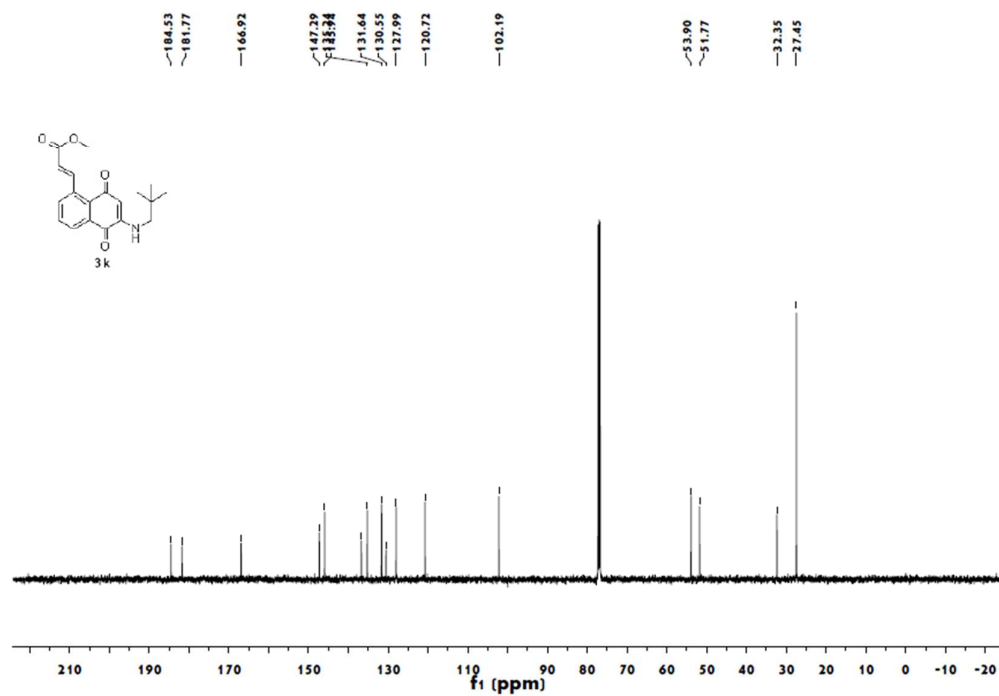

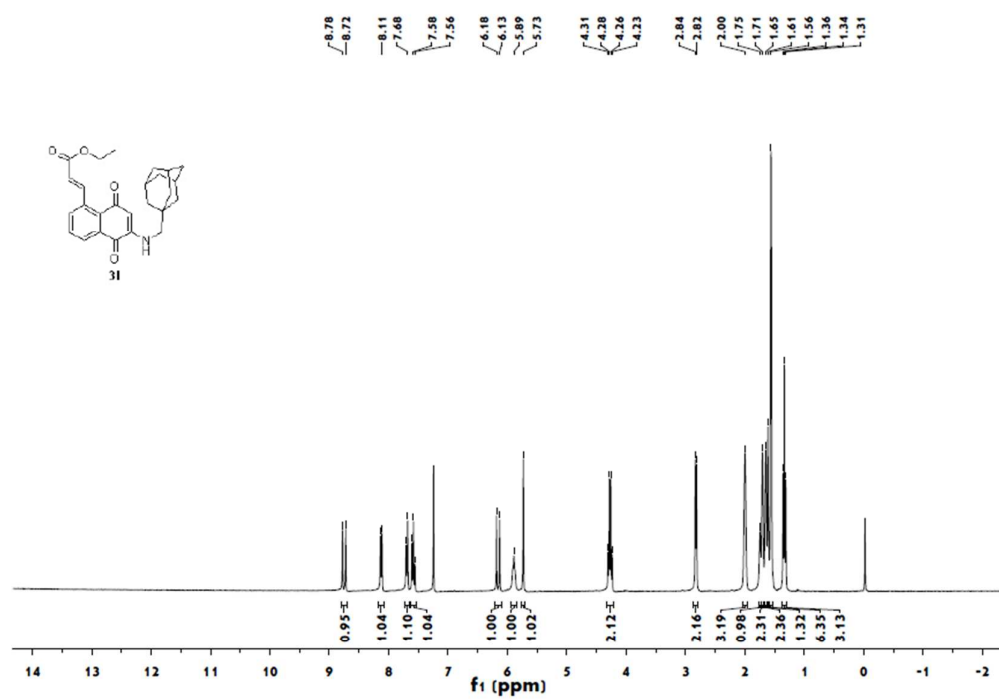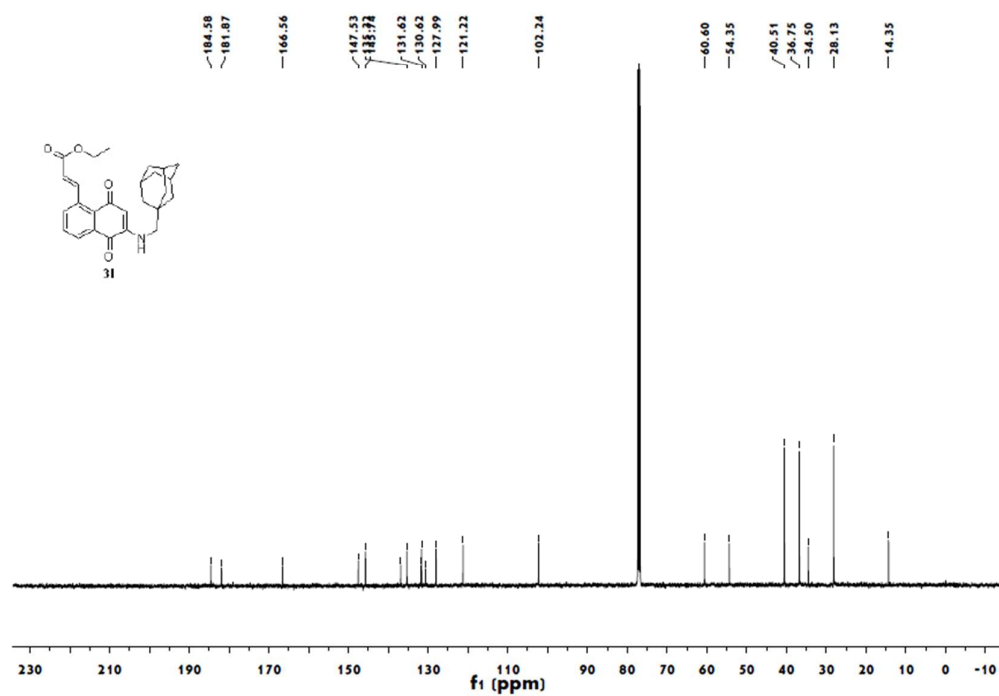

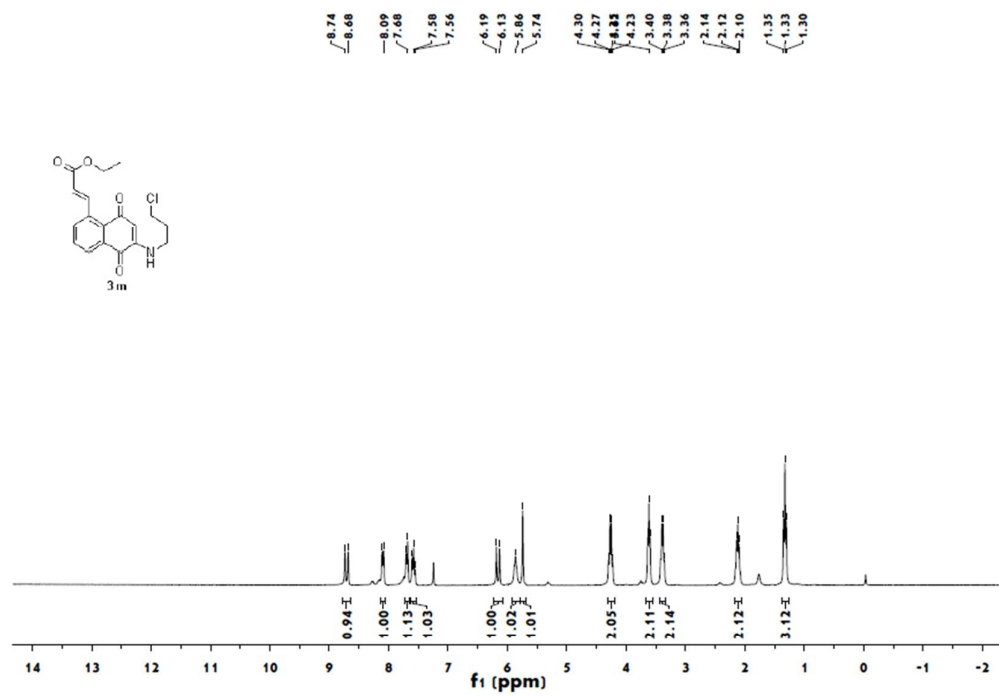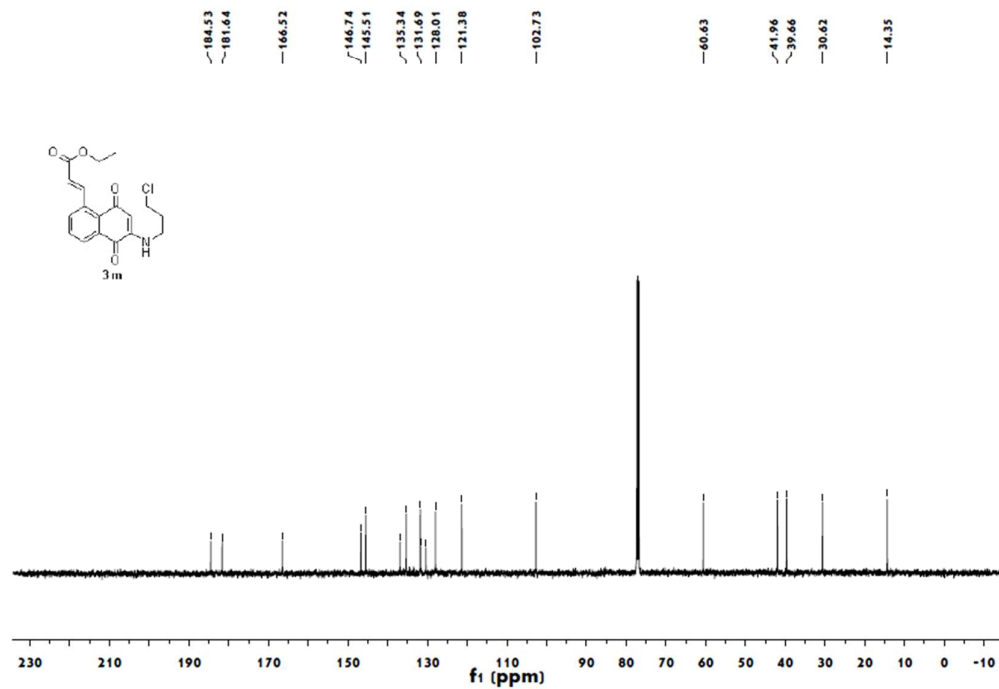

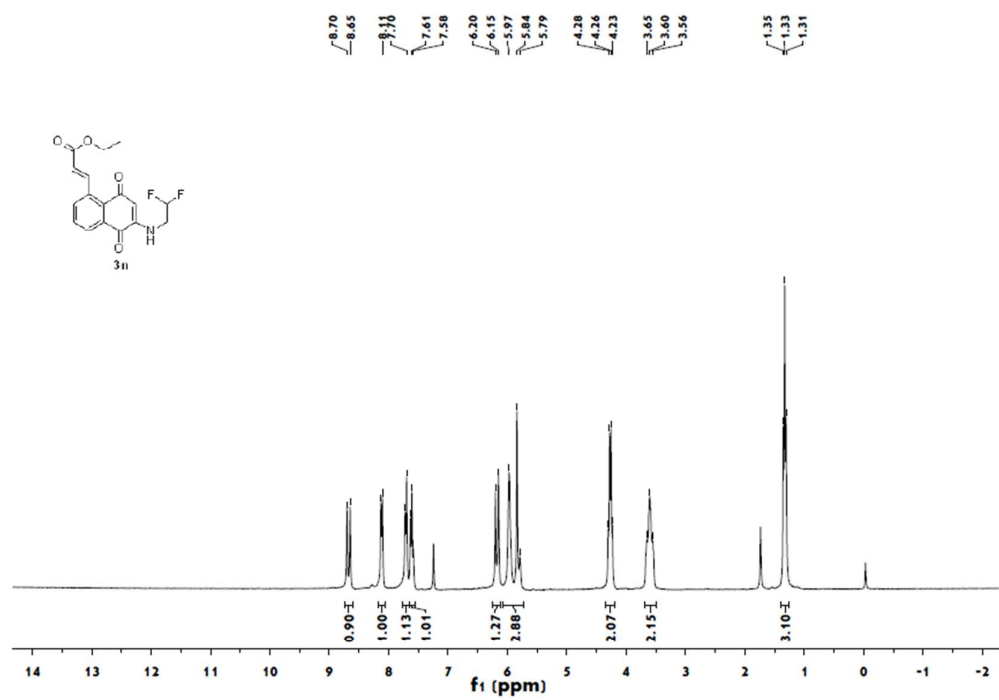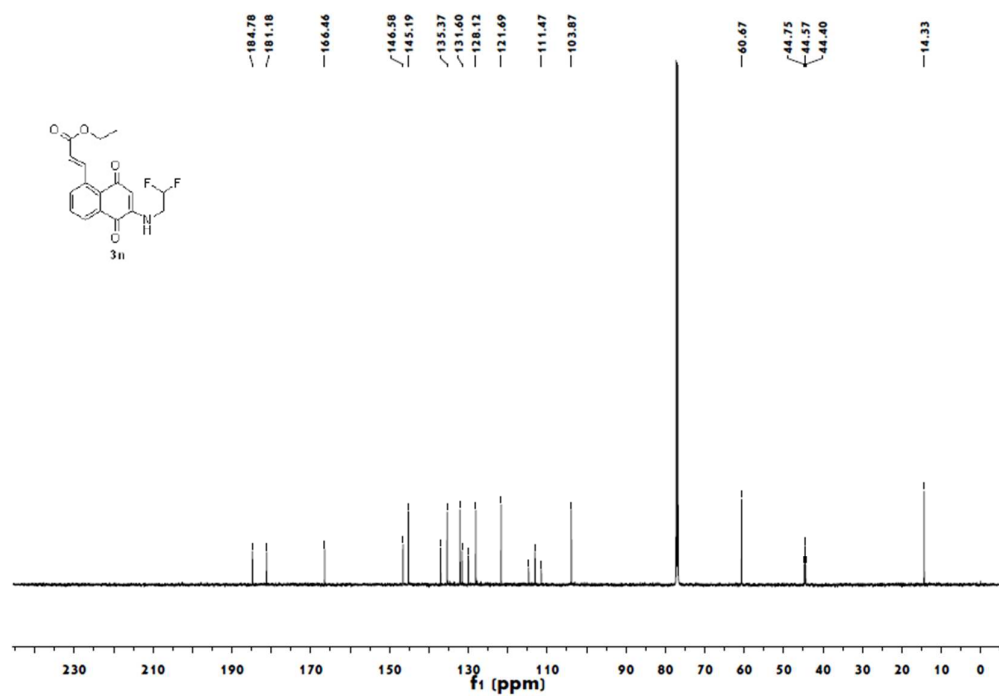

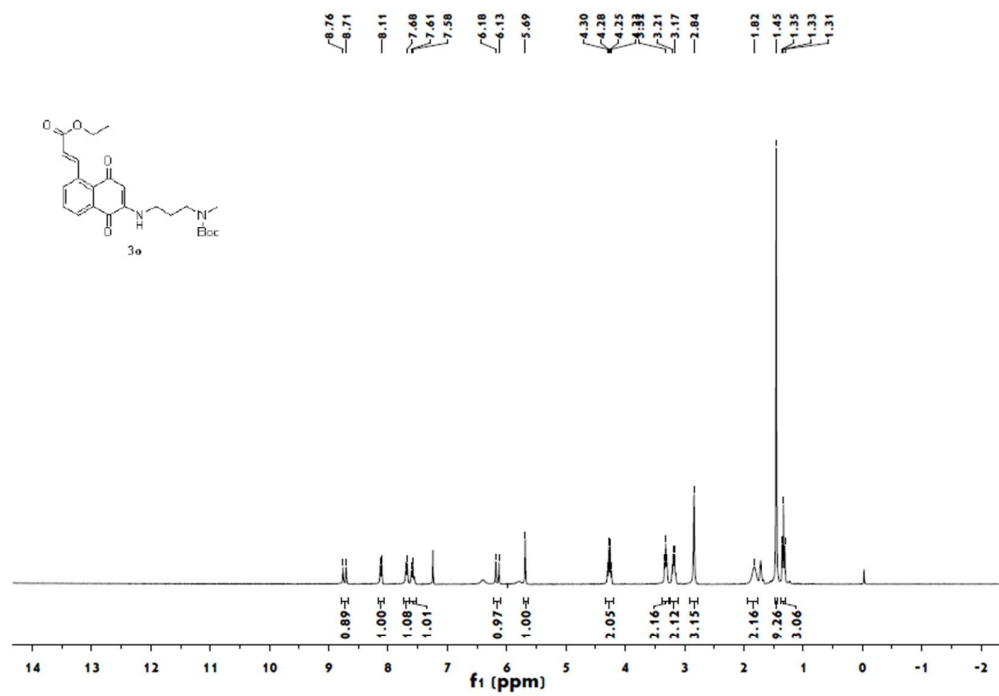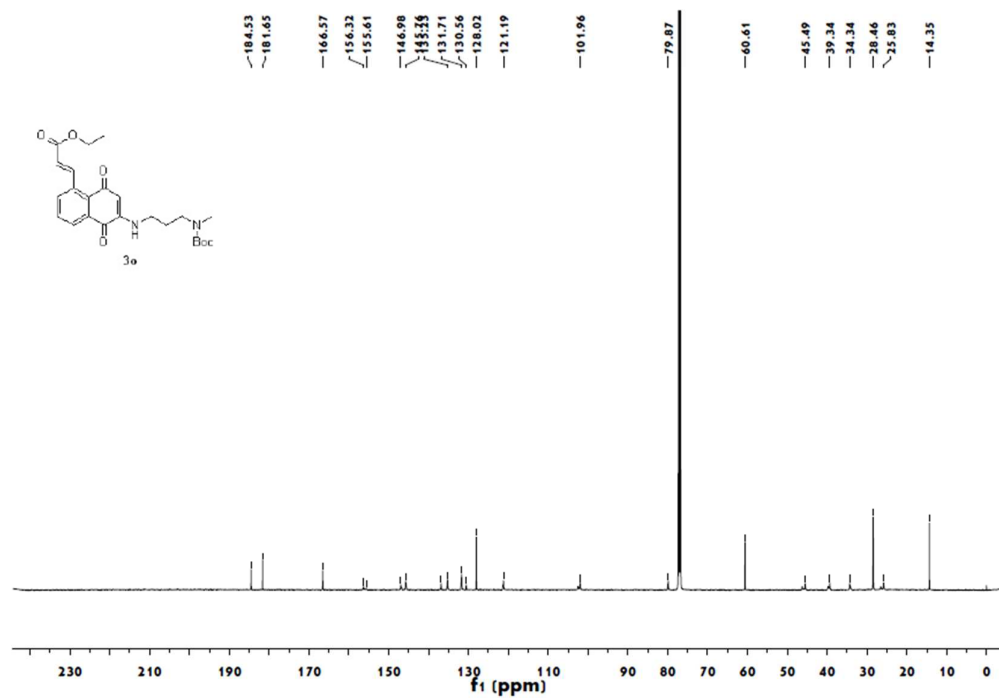

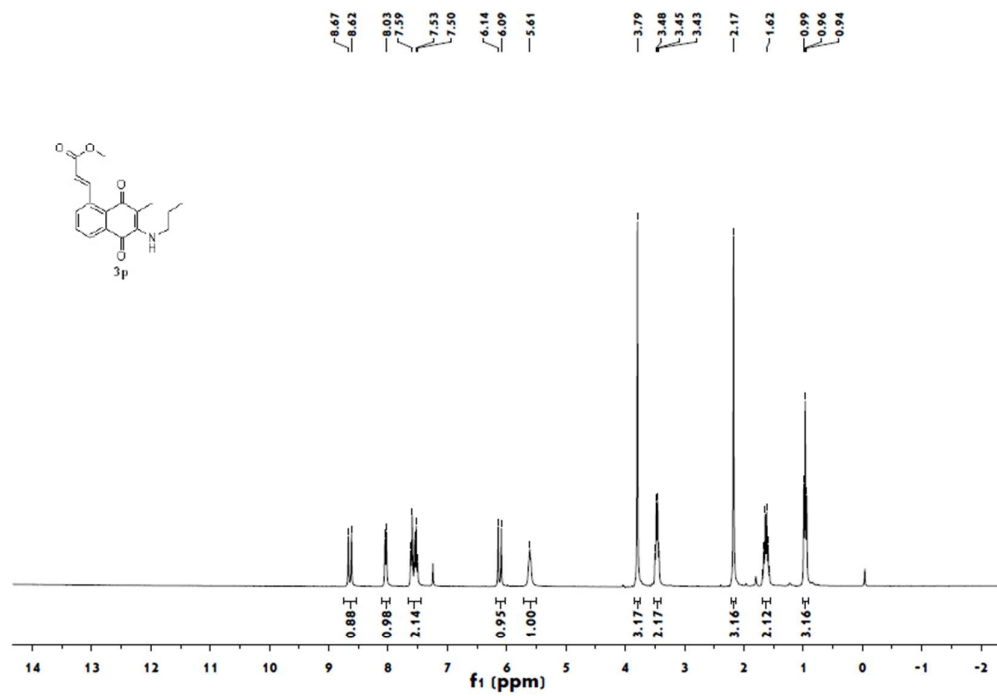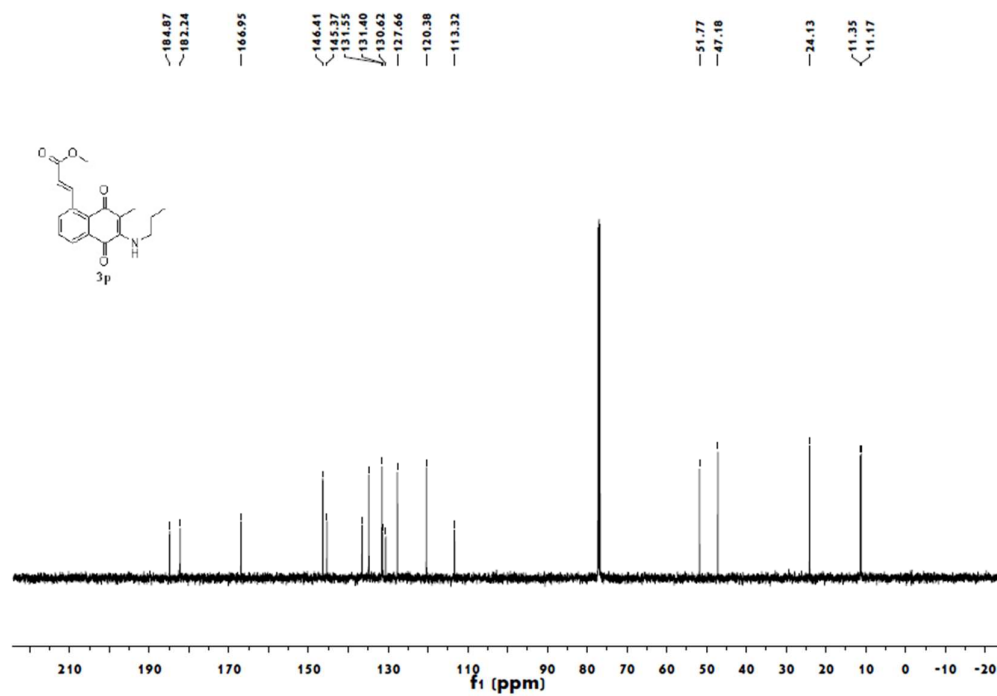

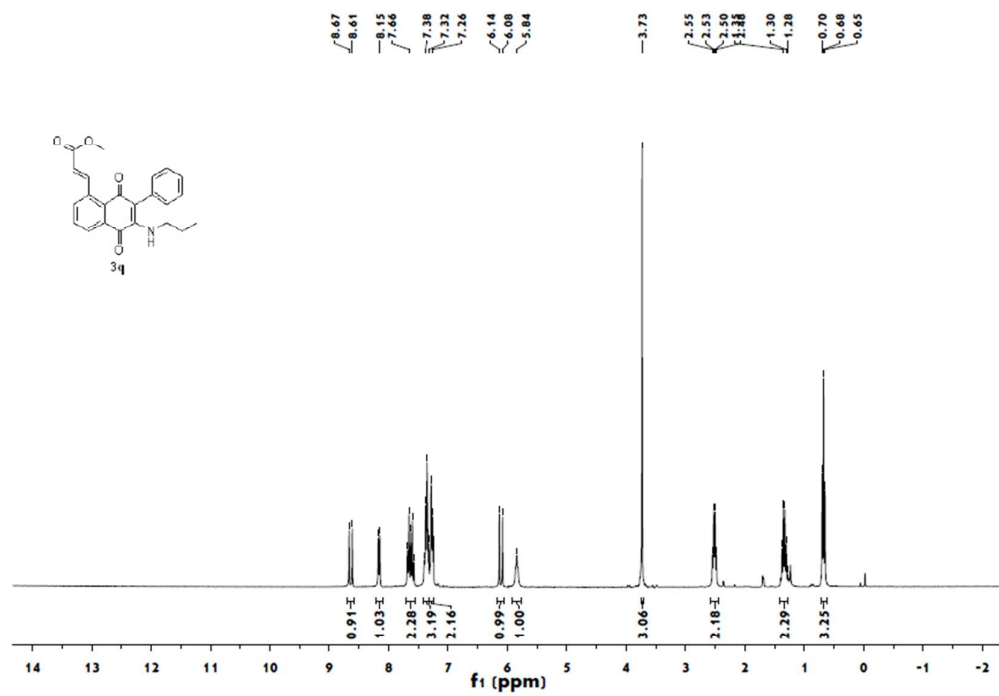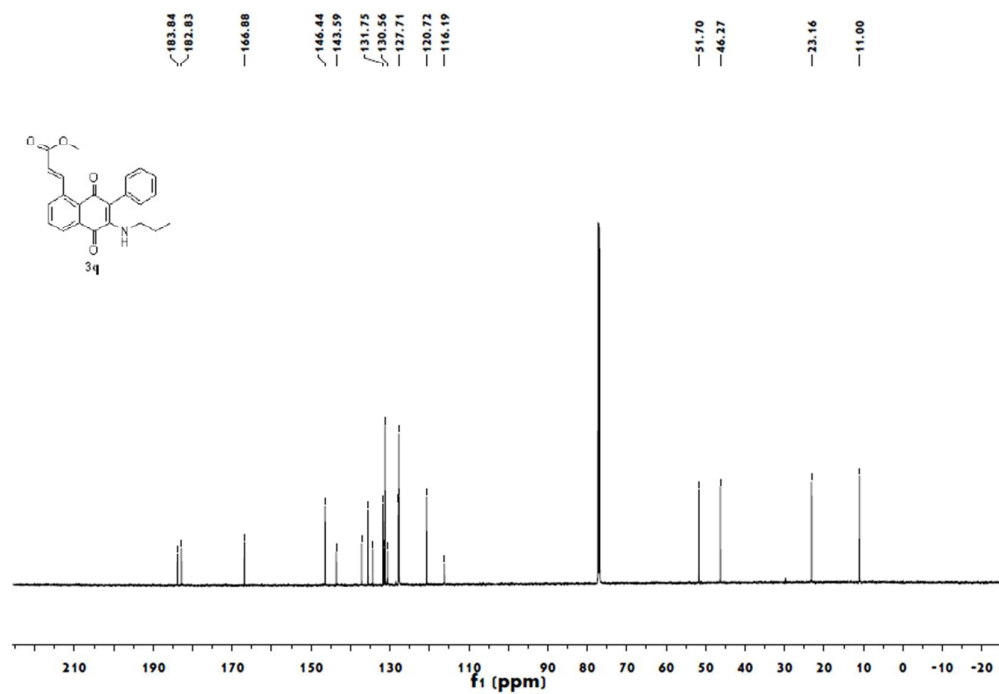

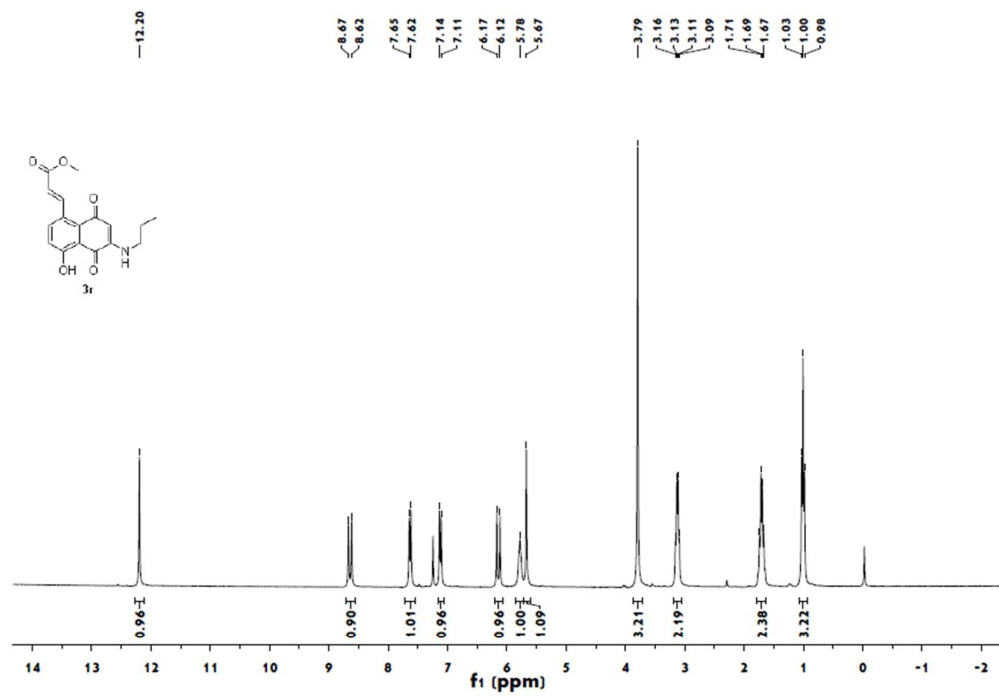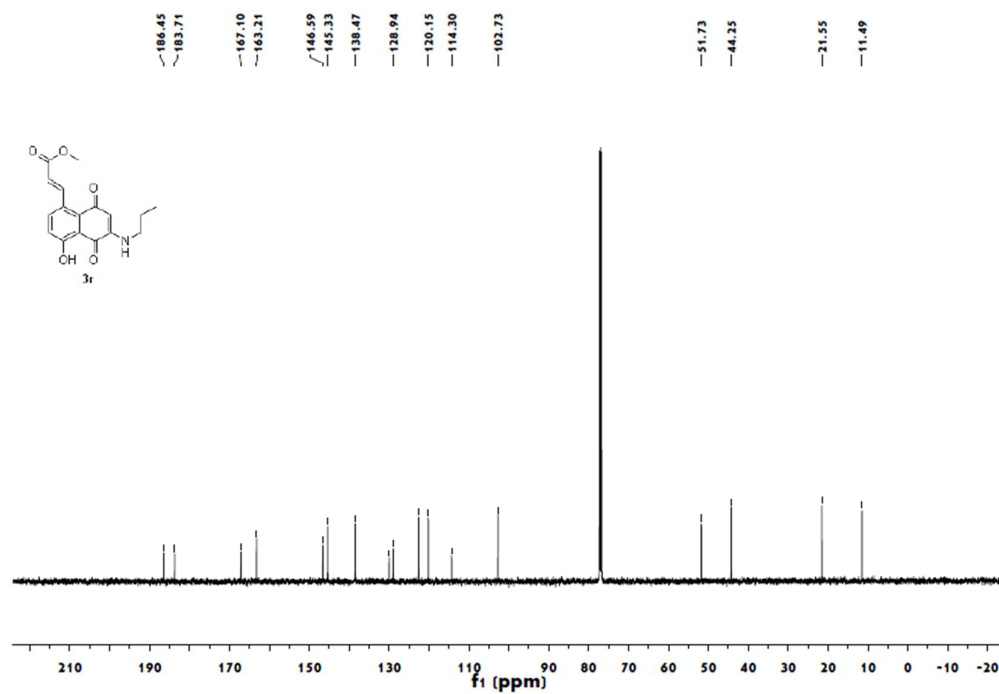



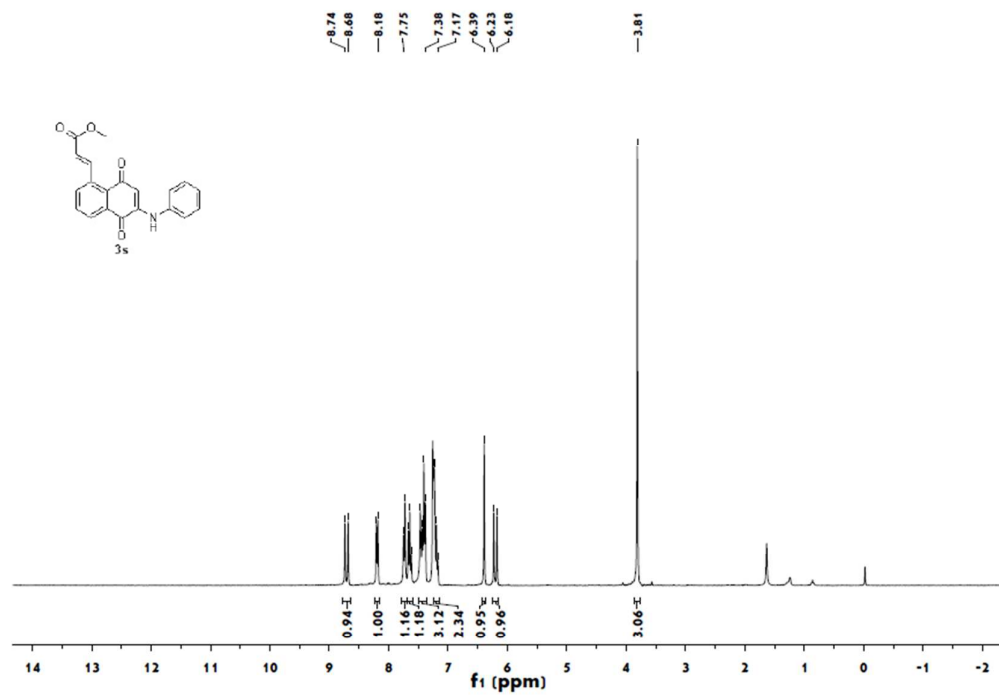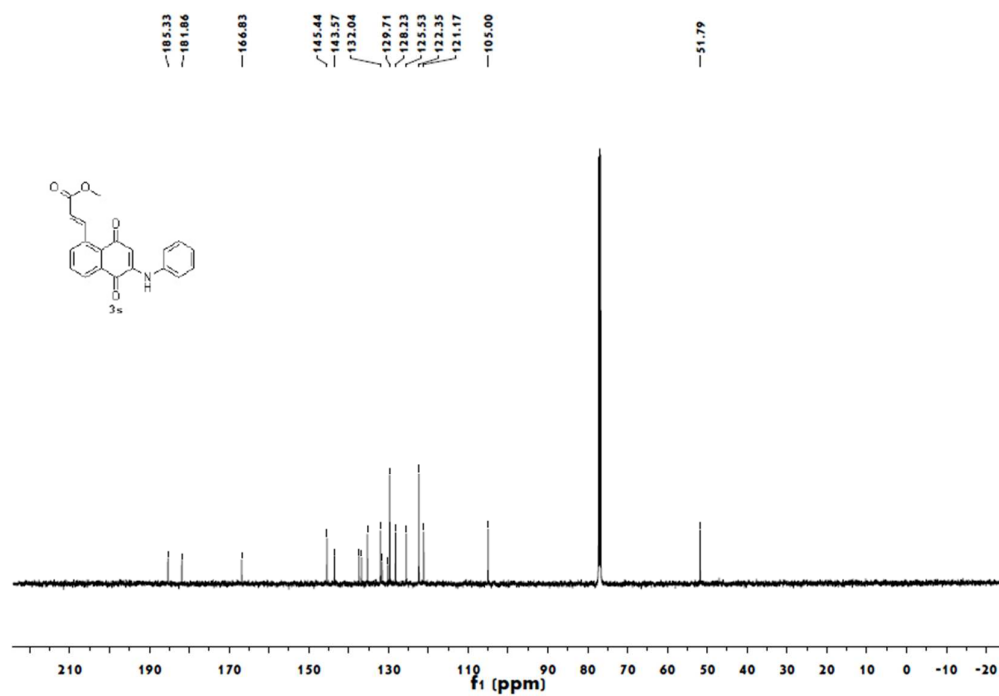

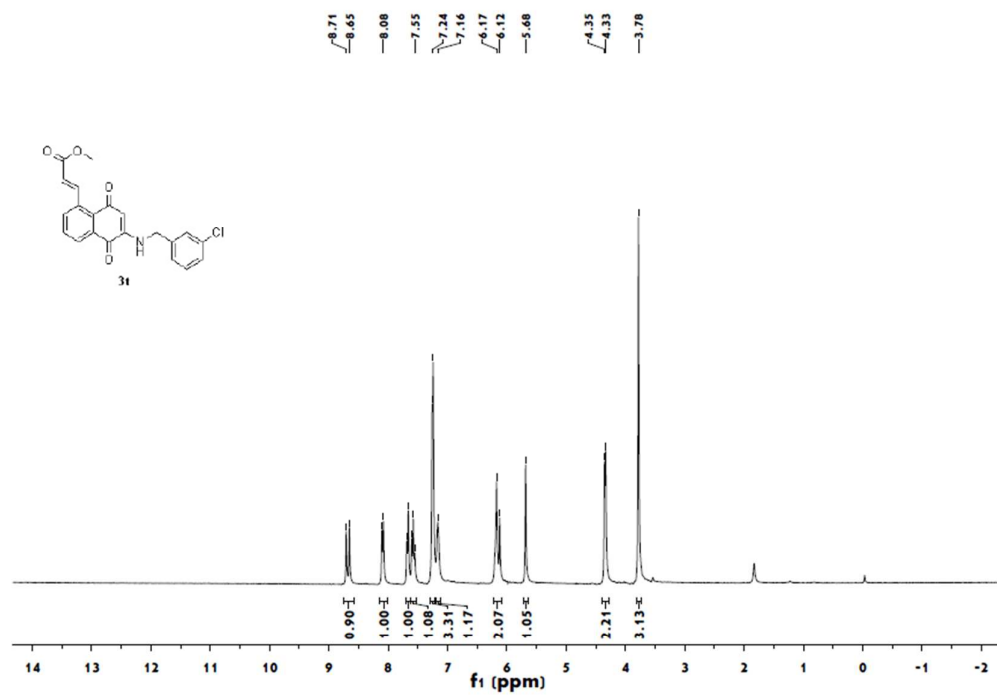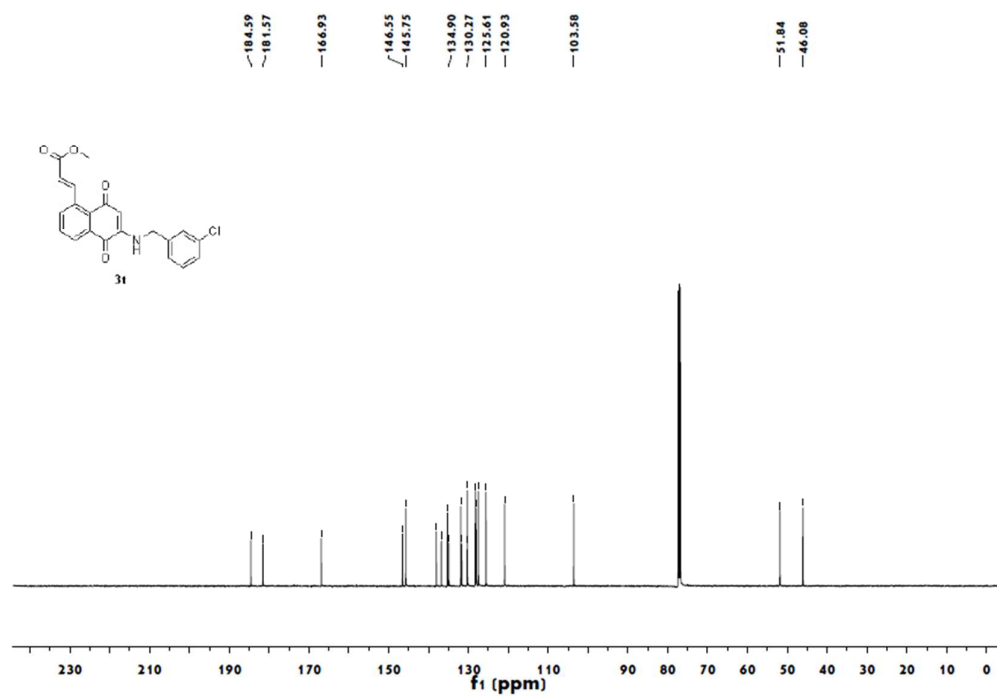

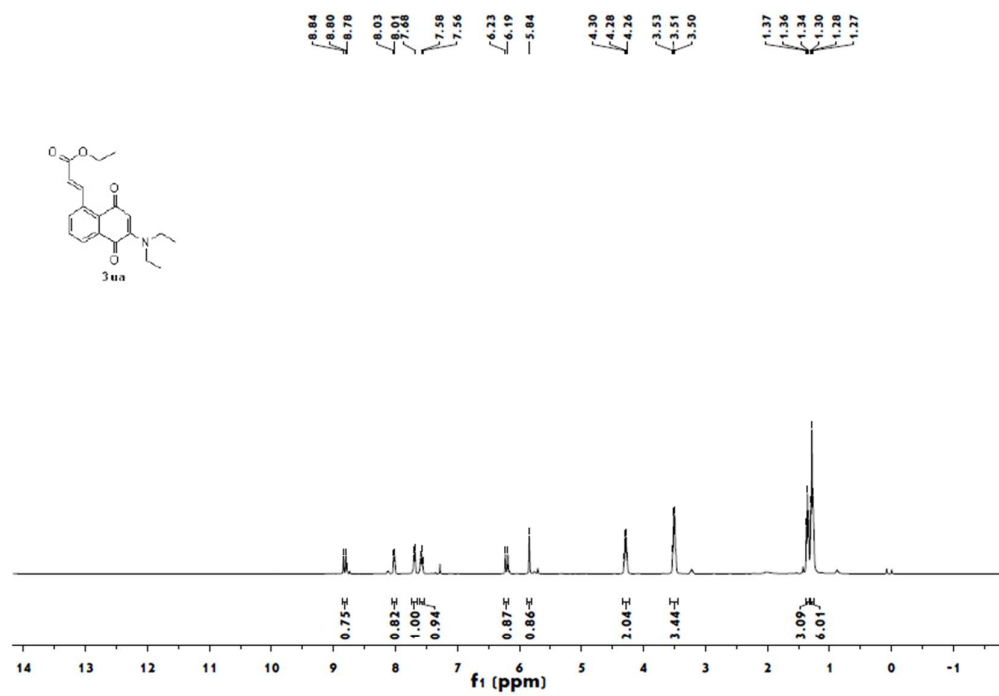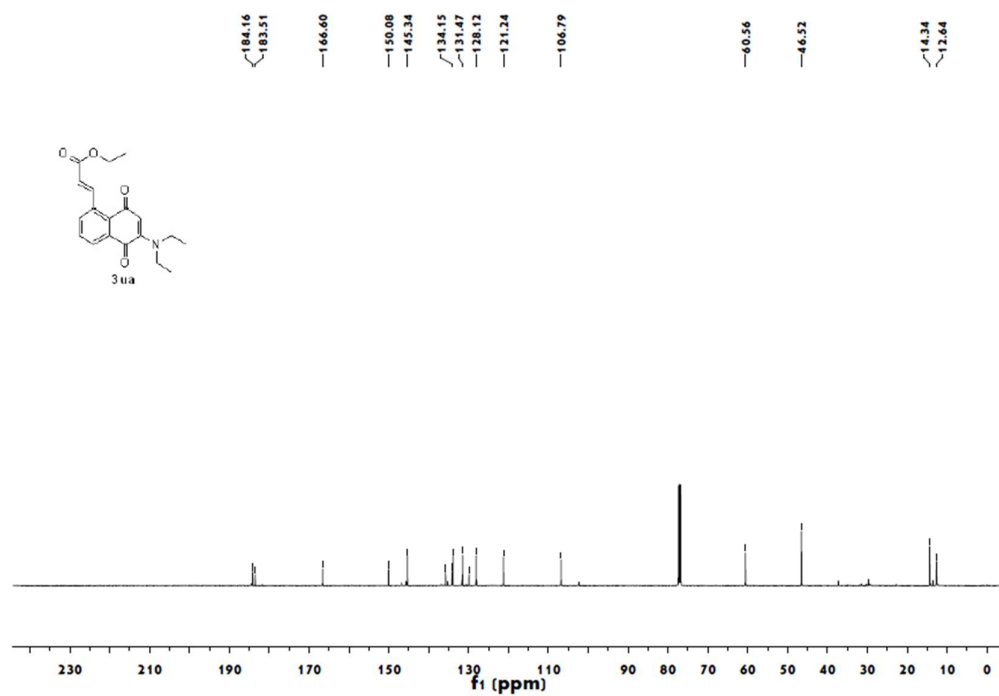

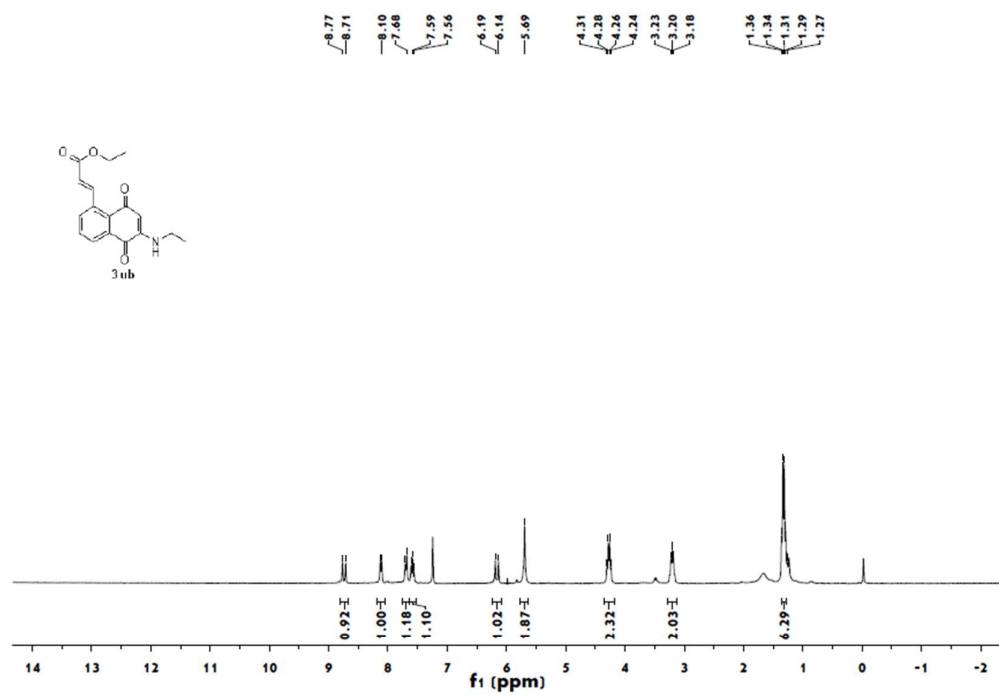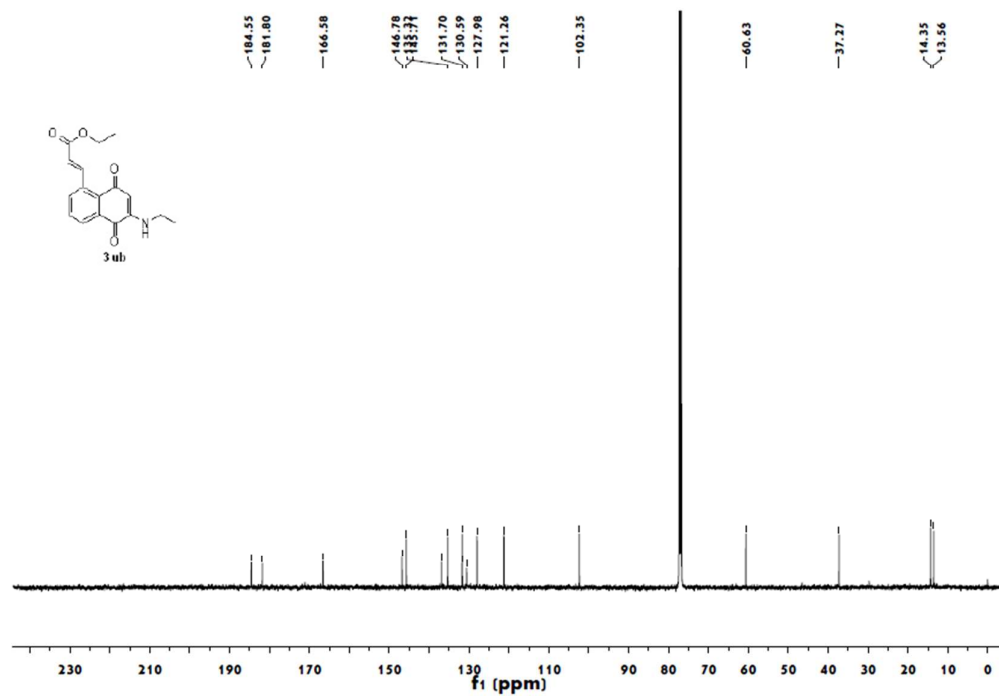

### 3. Kinetic isotope effect experiments.

A solution of substrate **1p** or  $[D_5]\text{-1p}$  (0.2 mmol), alkene **2a** (0.4 mmol),  $[\text{RhCp}^*\text{Cl}_2]_2$  (2.5 mol %),  $\text{AgSbF}_6$  (10 mol %), and  $\text{Cu}(\text{OAc})_2 \cdot \text{H}_2\text{O}$  (20 mol %) in DCE (1 mL) was stirred in sealed tube at 120 °C. A portion of the crude solution (0.1 mL) was taken out every 15 min, concentrated in vacuum, and then subjected to  $^1\text{H}$ -NMR measurement with 1,2-dibromomethane as the internal standard.

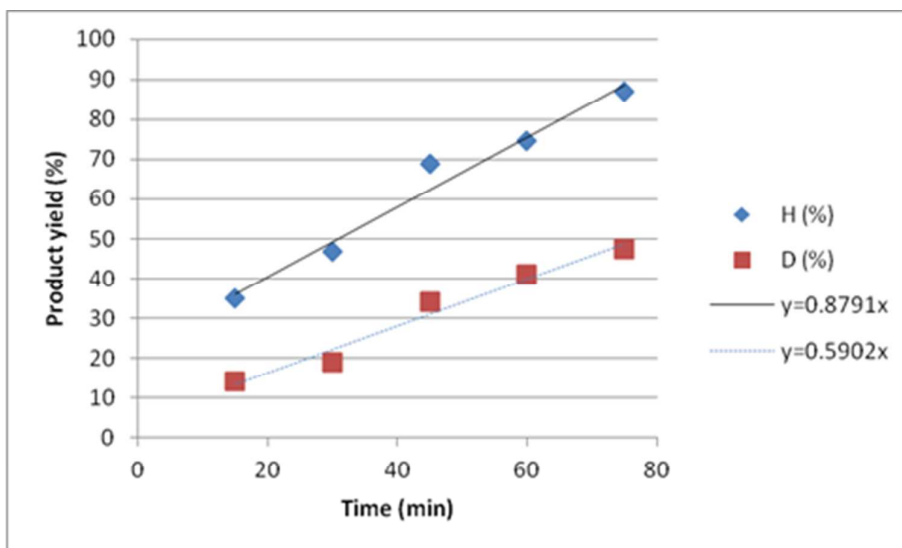

**Independent Initial Rate Comparison  $K_H/K_D$  for **3p** and  $[D_5]\text{-3p}$**
